# Supplementary material for: An efficient facile and one-pot synthesis of benzodiazepines and chemoselective 1,2-disubstituted benzimidazoles using a magnetically retrievable Fe3O4 nanocatalyst under solvent free conditions
Source: Royal Society of Chemistry journal article supplement (doi:10.1039/c3ra47860b), 2014-01-01
Supplement: c3ra47860b1.pdf [file c3ra47860b1.pdf]

**An efficient facile one-pot multicomponent synthesis of diazepines and benzimidazole using magnetically retrievable Fe<sub>3</sub>O<sub>4</sub> nanocatalyst under solvent free condition**

**Ramen Jamatia<sup>a</sup>, Mithu Saha<sup>a</sup>, Amarta Kumar Pal<sup>a\*</sup>**

*<sup>a</sup>Department of Chemistry, North-Eastern Hill University, Mawlai Campus, Shillong  
793022, India.*

Tel: +91 364 2307930 ext 2636, E-mail: [amartya\\_pal22@yahoo.com](mailto:amartya_pal22@yahoo.com), [akpal@nehu.ac.in](mailto:akpal@nehu.ac.in)

Fax: +91 364 2550076

| <b>Table of content</b>                                                                  | <b>Page No.</b> |
|------------------------------------------------------------------------------------------|-----------------|
| 1. Experimental Section                                                                  | 2-3             |
| 2. <b>Table S.I. 1.</b> X-ray crystallography data for compound <b>3b</b>                | 4               |
| 3. Spectral data of the compound <b>3a-h</b> and <b>5a-f</b>                             | 5-10            |
| 4. <b>Fig. S.I. 1.</b> I.R spectra of Fe <sub>3</sub> O <sub>4</sub> NPs                 | 11              |
| 5. <sup>1</sup> H & <sup>13</sup> C NMR Spectra of compounds <b>3a-h</b> and <b>5a-f</b> | 12-30           |

## 1. Experimental Section

Melting points were determined in open capillaries and are uncorrected. IR spectra were recorded on Spectrum BX FT-IR, Perkin Elmer ( $\nu_{\max}$  in  $\text{cm}^{-1}$ ) on KBr disks.  $^1\text{H}$  NMR and  $^{13}\text{C}$  NMR (400/300 MHz and 100/75 MHz respectively) spectra were recorded on Bruker Avance II-400 and 300 spectrometer in  $\text{CDCl}_3$  (chemical shifts in  $\delta$  with TMS as internal standard). Mass spectra were recorded on Waters ZQ-4000. Transmission Electron Microscope (TEM) was recorded on JEOL JSM 100CX. Scanning electron microscope (SEM) was recorded on JSM-6360 (JEOL). XRD was recorded on Bruker D8 XRD instrument SWAX. CHN were recorded on CHN-OS analyzer (Perkin Elmer 2400, Series II). Silica gel G (E-mark, India) was used for TLC. Hexane refers to the fraction boiling between 60 °C and 80 °C. Absorption spectra were recorded in Lambda25 (PerkinElmer Inc.) spectrometers.

### X-ray crystallography

The X-ray diffraction data were collected at 293 K with Mo  $K\alpha$  radiation ( $\lambda = 0.71073 \text{ \AA}$ ) using Agilent Xcalibur (Eos, Gemini) diffractometer equipped with a graphite monochromator. The software used for data collection CrysAlis PRO (Agilent, 2011), data reduction CrysAlis PRO and cell refinement CrysAlis PRO. The structure were solved by direct methods and refined by full-matrix least-squares calculation using SHELXS-97 and SHELXL-97 (CCDC 933681). Absorption spectra were recorded in Lambda25 (PerkinElmer Inc.) spectrometers.

### General procedure for 3a-h.

$\text{Fe}_3\text{O}_4$  (6 mol %) was added to a mixture of *o*-phenylenediamine **1** (1mmol) and acetophenone **2a-h** (2.2 mmol) and heated at 80 °C under solvent free condition. After completion of the reaction, monitored by TLC, the reaction mixture was cooled to room temperature and dissolved in 10 mL ethyl acetate. The  $\text{Fe}_3\text{O}_4$  NPs was then separated by external magnetic field. The

separated Fe<sub>3</sub>O<sub>4</sub> NPs was washed with ethyl acetate and dried. Then it was used for another set of reaction under similar condition. The reaction mixture was then washed with water (3 × 5mL), brine (1 × 5 mL) and dried over anhydrous Na<sub>2</sub>SO<sub>4</sub>. The reaction mass was concentrated under vacuum and the pure product was obtained by purification through column chromatography using ethyl acetate: hexane as eluent.

#### **General procedure for 5a-h.**

In a round bottom flask, *o*-phenylenediamine **1** (1mmol) and aldehyde **4a-f** (2.2 mmol), was taken and Fe<sub>3</sub>O<sub>4</sub> NPs (6 mol %) was added. The reaction was carried out at 80 °C under solvent free condition. After completion (TLC), the reaction mixture was cooled to room temperature and dissolved in 10 mL ethyl acetate. The Fe<sub>3</sub>O<sub>4</sub> NPs was then separated by external magnetic field and washed with ethyl acetate and dried. The separated Fe<sub>3</sub>O<sub>4</sub> NPs was then used for another set of reaction under similar condition. The reaction mixture was then washed with water (3 × 5mL), brine (1 × 5 mL) and dried over anhydrous Na<sub>2</sub>SO<sub>4</sub>. The reaction mass was concentrated under vacuum. The crude mixture was purified by column chromatography using ethyl acetate: hexane as eluent.

**Table S.I.1.** X-ray crystallography data for compound **3b**.

|                                            |                                                                |
|--------------------------------------------|----------------------------------------------------------------|
| Empirical formula                          | C <sub>22</sub> H <sub>18</sub> Cl <sub>2</sub> N <sub>2</sub> |
| Formula weight                             | 381.28                                                         |
| Crystal system                             | Monoclinic                                                     |
| Space group                                | <i>P</i> 2 <sub>1</sub> / <i>n</i>                             |
| <i>a</i> (Å)                               | 14.0976(12)                                                    |
| <i>b</i> (Å)                               | 10.0170(7)                                                     |
| <i>c</i> (Å)                               | 14.9301(13)                                                    |
| $\alpha$ (°)                               | 90.00                                                          |
| $\beta$ (°)                                | 116.746(11)                                                    |
| $\gamma$ (°)                               | 90.00                                                          |
| Volume (Å <sup>3</sup> )                   | 1882.8(3)                                                      |
| $\rho$ (calculated) (g cm <sup>-3</sup> )  | 1.345                                                          |
| T(K)                                       | 293(2)                                                         |
| Absorption coefficient (mm <sup>-1</sup> ) | 0.353                                                          |
| Total reflection collected                 | 9789                                                           |
| Independent reflection                     | 4403                                                           |
| Refine parameter                           | 336                                                            |
| $\theta$ range (°)                         | 6.6 to 58.22                                                   |
| Final R Indexes [ $I \geq 2\sigma(I)$ ]    | R1 = 0.0548, wR2 = 0.1174                                      |
| Final R indexes [all data]                 | R1 = 0.0979, wR2 = 0.1375                                      |
| Goodness-of-fit on F <sup>2</sup>          | 1.018                                                          |

## SPECTRAL DATA

### 1. Compound 3a

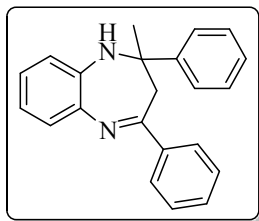

White solid. IR (KBr): 3281, 3066, 1635, 1468  $\text{cm}^{-1}$ .  $^1\text{H}$  NMR ( $\text{CDCl}_3$ , 400 MHz):  $\delta$  = 7.53 (t,  $J$  = 7.6 Hz, 4H), 7.26-7.08 (m, 7H), 7.03-6.95 (m, 2H), 6.78-6.76 (dd,  $J$  = 7.6, 1.2 Hz, 1H), 3.4 (brs, 1H), 3.08 (d,  $J$  = 13.2 Hz, 1H), 2.92 (d,  $J$  = 13.2 Hz, 1H), 1.68 (s, 3H).  $^{13}\text{C}$  NMR ( $\text{CDCl}_3$ , 100 MHz):  $\delta$  = 167.7, 147.6, 140.1, 139.5, 138.1, 129.7, 128.6, 128.3, 128.0, 127.1, 126.3, 125.4, 121.6, 121.4, 73.7, 43.1, 29.8. ESI- MS:  $m/z$  313  $[\text{M} + \text{H}]^+$ . Anal. Calcd for  $\text{C}_{22}\text{H}_{20}\text{N}_2$ : C, 84.58; H, 6.45; N, 8.97. Found: C, 84.47; H, 6.39; N, 8.80.

### 2. Compound 3b

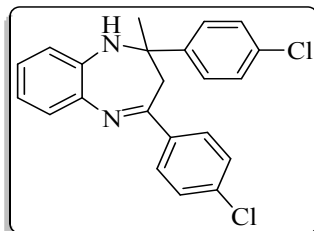

Yellow solid. IR (KBr): 3496, 3025, 1686, 1493, 751  $\text{cm}^{-1}$ .  $^1\text{H}$  NMR ( $\text{CDCl}_3$ , 300 MHz):  $\delta$  = 7.51-7.45 (m, 4H), 7.30-7.25 (m, 1H), 7.20-7.17 (m, 4H), 7.07-7.01 (m, 2H), 6.82-6.76 (m, 1H), 3.41 (s, 1H), 3.07 (d,  $J$  = 13.3 Hz, 1H), 2.88 (d,  $J$  = 13.5, 1H), 1.71 (s, 3H).  $^{13}\text{C}$  NMR ( $\text{CDCl}_3$ , 100 MHz):  $\delta$  = 166.1, 145.7, 139.8, 137.6, 136.1, 133.0, 128.5, 128.38, 128.31, 127.0, 126.6, 122.0, 121.5, 73.5, 42.9, 29.7. ESI- MS:  $m/z$  381, 383  $[\text{M} + \text{H}]^+$ . Anal. Calcd for  $\text{C}_{22}\text{H}_{18}\text{Cl}_2\text{N}_2$ : C, 69.30; H, 4.76; N, 7.35. Found: C, 69.53; H, 4.64; N, 7.44.

### 3. Compound 3c

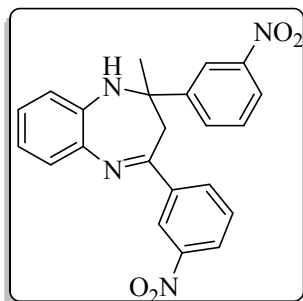

Orange solid. IR (KBr): 3278, 3088, 1604, 1473, 1349  $\text{cm}^{-1}$ .  $^1\text{H}$  NMR ( $\text{CDCl}_3$ , 300 MHz):  $\delta$  = 8.47 (s, 1H), 8.16 (s, 1H), 8.12 (d,  $J$  = 8.1 Hz, 1H), 7.99-7.96 (m, 3H), 7.42-7.32 (m, 3H), 7.18-7.08 (m, 2H), 6.93-6.91 (dd,  $J$  = 7.5 Hz, 1.2 Hz, 1H), 3.55 (s, 1H), 3.28 (d,  $J$  = 13.5 Hz, 1H), 3.02 (d,  $J$  = 13.5, 1H), 1.87 (s, 3H).  $^{13}\text{C}$  NMR ( $\text{CDCl}_3$ , 100 MHz):  $\delta$  = 164.1, 149.0, 148.1, 148.0, 140.4, 139.2, 137.1, 132.5, 131.9, 129.5, 129.2, 128.9, 127.4, 124.4, 122.4, 122.2, 121.6, 120.8, 74.1, 42.8, 29.9. ESI- MS:  $m/z$  403  $[\text{M} + \text{H}]^+$ . Anal. Calcd for  $\text{C}_{22}\text{H}_{18}\text{N}_4\text{O}_4$ : C, 65.66; H, 4.51; N, 13.92. Found: C, 65.61; H, 4.62; N, 13.80.

### 4. Compound 3d

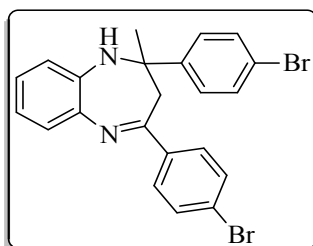

Pale brown solid. IR (KBr): 3370, 2979  $\text{cm}^{-1}$ .  $^1\text{H}$  NMR ( $\text{CDCl}_3$ , 300 MHz):  $\delta$  = 7.46-7.27 (m, 9H), 7.11-7.01 (m, 2H), 6.83-6.80 (m, 1H), 3.42 (s, 1H), 3.07 (d,  $J$  = 13.2 Hz, 1H), 2.89 (d,  $J$  = 13.2 Hz, 1H), 1.72 (s, 3H).  $^{13}\text{C}$  NMR ( $\text{CDCl}_3$ , 100 MHz):  $\delta$  = 166.2, 146.5, 140.0, 138.3, 137.7, 131.5, 131.4, 128.8, 128.7, 127.6, 126.8, 124.7, 122.2, 121.7, 121.4, 73.7, 43.0, 29.9. ESI-MS:  $m/z$  469, 471  $[\text{M} + \text{H}]^+$ . Anal. Calcd for  $\text{C}_{22}\text{H}_{18}\text{Br}_2\text{N}_2$ : C, 56.20; H, 3.86; N, 5.96. Found: C, 56.12; H, 3.88; N, 5.77.

## 5. Compound 3e

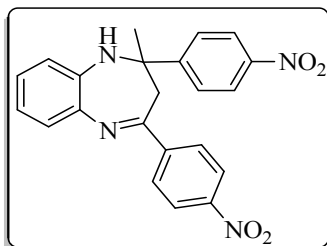

Orange solid. IR (KBr): 3310, 3071, 1606, 1348  $\text{cm}^{-1}$ .  $^1\text{H}$  NMR ( $\text{CDCl}_3$ , 400 MHz):  $\delta$  = 8.00 (d,  $J$  = 8.8 Hz, 4H), 7.69 (d,  $J$  = 8.8 Hz), 7.62 (d,  $J$  = 8.8 Hz, 2H), 7.28 (d,  $J$  = 7.2 Hz, 1H), 7.11-7.09 (m, 1H), 7.08-7.00 (m, 1H), 6.84 (d,  $J$  = 7.6 Hz, 1H), 3.58 (s, 1H), 3.24 (d,  $J$  = 13.2 Hz, 1H), 2.95 (d,  $J$  = 13.6, 1H), 1.77 (s, 3H). ESI- MS:  $m/z$  403  $[\text{M} + \text{H}]^+$ . Anal. Calcd for  $\text{C}_{22}\text{H}_{18}\text{N}_4\text{O}_4$ : C, 65.66; H, 4.51; N, 13.92. Found: C, 65.38; H, 4.46; N, 13.79.

## 6. Compound 3f

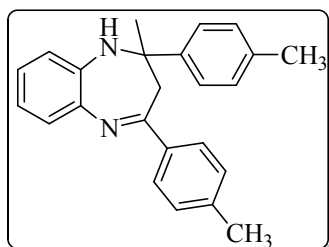

Orange solid. IR (KBr): 3319, 3023, 1600, 1463  $\text{cm}^{-1}$ .  $^1\text{H}$  NMR ( $\text{CDCl}_3$ , 400 MHz):  $\delta$  = 7.50-6.74 (m, 12H), 3.44 (brs, 1H), 3.02 (d,  $J$  = 13.2 Hz, 1H), 2.92 (d,  $J$  = 13.2 Hz, 1H), 2.26 (s, 3H), 2.33 (s, 3H), 1.65 (s, 3H). ESI- MS:  $m/z$  341  $[\text{M} + \text{H}]^+$ . Anal. Calcd for  $\text{C}_{24}\text{H}_{24}\text{N}_2$ : C, 84.67; H, 7.11; N, 8.23. Found: C, 84.71; H, 6.97; N, 8.44.

## 7. Compound 3g

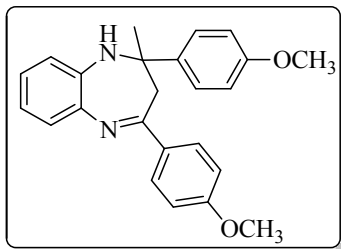

Orange solid. IR (KBr): 3321, 1606, 1467, 1245, 1030  $\text{cm}^{-1}$ .  $^1\text{H}$  NMR ( $\text{CDCl}_3$ , 300 MHz):  $\delta$  = 7.60 (d,  $J$  = 8.7 Hz, 2H), 7.53 (d,  $J$  = 8.7 Hz, 2H), 7.30-7.26 (m, 1H), 7.05-7.02 (m, 2H), 6.81-6.74 (m, 5H), 3.79 (s, 3H), 3.75 (s, 3H), 3.41 (s, 1H), 3.06 (d,  $J$  = 12.9 Hz, 1H), 2.92 (d,  $J$  = 13.2 Hz, 1H), 1.71 (s, 3H).  $^{13}\text{C}$  NMR ( $\text{CDCl}_3$ , 100 MHz):  $\delta$  = 167.3, 161.2, 158.7, 140.8, 140.2, 138.2, 132.4, 129.0, 128.3, 126.7, 126.0, 121.9, 121.7, 113.7, 113.5, 73.5, 55.49, 55.47, 43.0, 29.9. ESI-MS:  $m/z$  373  $[\text{M} + \text{H}]^+$ . Anal. Calcd for  $\text{C}_{24}\text{H}_{24}\text{N}_2\text{O}_2$ : C, 77.39; H, 6.49; N, 7.52. Found: C, 77.57; H, 6.37; N, 7.64.

### 8. Compound 3h

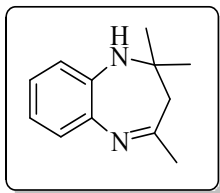

Pale brown solid. IR (KBr): 3283, 1467, 1639  $\text{cm}^{-1}$ .  $^1\text{H}$  NMR ( $\text{CDCl}_3$ , 300 MHz):  $\delta$  = 7.14-7.11 (m, 1H), 7.01-6.97 (m, 2H), 6.75-6.72 (m, 1H), 2.97 (brs, 1H), 2.37 (s, 3H), 2.22 (s, 2H), 1.35 (s, 6H). ESI-MS:  $m/z$  189  $[\text{M} + \text{H}]^+$ . Anal Calcd for  $\text{C}_{12}\text{H}_{16}\text{N}_2$ : C, 76.55; H, 8.57; N, 14.88. Found: C, 76.82; H, 8.70; N, 14.83.

### 9. Compound 5a

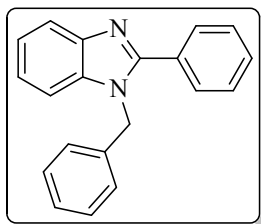



Pale white solid. IR (KBr): 3083, 3029, 2957, 1611, 1276  $\text{cm}^{-1}$ . NMR ( $\text{CDCl}_3$ , 300 MHz):  $\delta$  = 7.83 (d,  $J$  = 8 Hz, 1H), 7.63 (d,  $J$  = 6.8 Hz, 2H), 7.40-7.05 (m, 9H), 5.40 (s, 2H). ESI-MS:  $m/z$  285  $[\text{M} + \text{H}]^+$ . Anal. Calcd for  $\text{C}_{20}\text{H}_{16}\text{N}_2$ : C, 84.48; H, 5.67; N, 9.85. Found: C, 84.37; H, 5.55; N, 9.68.

## 10. Compound 5b

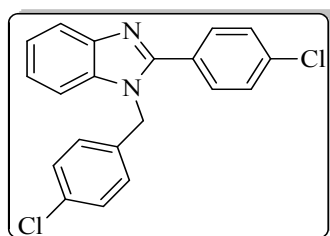

Pale white solid. IR (KBr): 3075, 2928, 2852, 1611, 1250, 744  $\text{cm}^{-1}$ .  $^1\text{H}$  NMR ( $\text{CDCl}_3$ , 400 MHz):  $\delta$  = 7.81 (d,  $J$  = 7.6 Hz, 1H), 7.53 (d,  $J$  = 8.4 Hz, 2H), 7.38 (d,  $J$  = 8.4 Hz, 2H), 7.29-7.19 (m, 4H), 7.14 (d,  $J$  = 8 Hz, 1H), 6.96 (d,  $J$  = 8 Hz, 2H), 5.33 (s, 2H).  $^{13}\text{C}$  NMR ( $\text{CDCl}_3$ , 100 MHz):  $\delta$  = 152.8, 142.9, 136.3, 135.8, 134.6, 133.8, 130.4, 129.3, 129.1, 128.2, 127.2, 123.5, 123.1, 120.1, 110.3, 47.8. ESI- MS:  $m/z$  353, 355  $[\text{M} + \text{H}]^+$ . Anal. Calcd for  $\text{C}_{20}\text{H}_{14}\text{Cl}_2\text{N}_2$ : C, 68.00; H, 3.99; N, 7.93. Found: C, 68.21; H, 4.03; N, 7.82.

## 11. Compound 5c

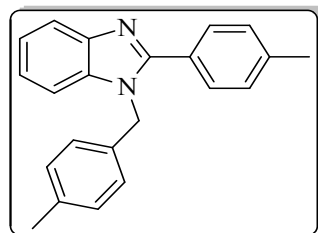

White solid. IR (KBr): 3073, 2924, 2857, 1607, 1281  $\text{cm}^{-1}$ .  $^1\text{H}$  NMR ( $\text{CDCl}_3$ , 400 MHz):  $\delta$  = 7.86 (d,  $J$  = 7.9 Hz, 1H), 7.59 (d,  $J$  = 8.1 Hz, 2H), 7.32-7.20 (m, 5H), 7.14 (d,  $J$  = 7.9 Hz, 2H), 7.01 (d,  $J$  = 7.9 Hz, 2H), 5.41 (s, 2H), 2.40 (s, 3H), 2.33 (s, 3H). ESI- MS:  $m/z$  313  $[\text{M} + \text{H}]^+$ . Anal. Calcd for  $\text{C}_{22}\text{H}_{20}\text{N}_2$ : C, 84.58; H, 6.45; N, 8.97. Found: C, 84.78; H, 6.31; N, 8.70.

## 12. Compound 5d

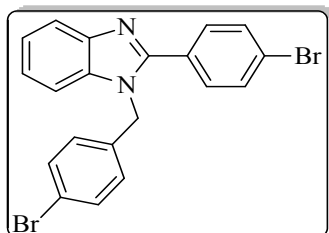

Pale white solid. IR (KBr): 3072, 2928, 2851, 1610, 1251, 617  $\text{cm}^{-1}$ .  $^1\text{H}$  NMR ( $\text{CDCl}_3$ , 400 MHz):  $\delta$  = 7.81 (d,  $J$  = 8 Hz, 1H), 7.60-7.56 (m, 2H), 7.29-7.07 (m, 5H), 6.97-6.93 (m, 4H), 5.34 (s, 2H).  $^{13}\text{C}$  NMR ( $\text{CDCl}_3$ , 100 MHz):  $\delta$  = 152.8, 142.9, 135.8, 135.1, 132.3, 132.1, 130.6, 128.7, 127.5, 124.7, 123.5, 123.1, 121.9, 120.1, 110.3, 47.8. ESI- MS:  $m/z$  441, 443  $[\text{M} + \text{H}]^+$ . Anal. Calcd for  $\text{C}_{20}\text{H}_{14}\text{Br}_2\text{N}_2$ : C, 54.33; H, 3.19; N, 6.34. Found: C, 54.25; H, 3.25; N, 6.17.

## 13. Compound 5e

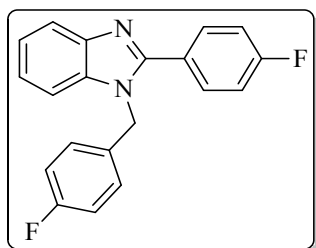

Yellow solid. IR (KBr): 3050, 2923, 2871, 1624, 1243  $\text{cm}^{-1}$ .  $^1\text{H}$  NMR ( $\text{CDCl}_3$ , 400 MHz):  $\delta$  = 7.83 (d,  $J$  = 8 Hz, 1H), 7.55(d,  $J$  = 8.4 Hz, 2H), 7.47 (d,  $J$  = 8.4Hz, 2H), 7.41 (d,  $J$  = 8.4 Hz, 2H), 7.30-7.19 (m, 2H), 7.14 (d,  $J$  = 8 Hz, 1H), 6.90 (d,  $J$  = 8 Hz, 2H), 5.32 (s, 2H). ESI- MS:  $m/z$  321  $[\text{M} + \text{H}]^+$  Anal. Calcd for  $\text{C}_{20}\text{H}_{14}\text{F}_2\text{N}_2$ : C, 74.99; H, 4.41; N, 8.75. Found: C, 75.23; H, 4.29; N, 8.72.

## 14. Compound 5f

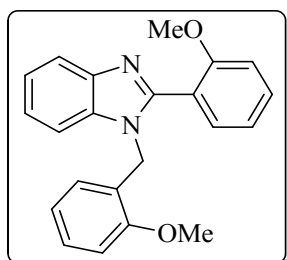

Pale white solid. IR (KBr): 3063, 2936, 2838, 1604, 1246, 1110  $\text{cm}^{-1}$ .  $^1\text{H}$  NMR ( $\text{CDCl}_3$ , 400 MHz):  $\delta$  = 7.80 (d,  $J$  = 8 Hz, 1H), 7.48 (d,  $J$  = 7.2 Hz, 1H), 7.41 (t,  $J$  = 7.8 Hz, 1H), 7.22-7.10 (m, 4H), 7.00 (t,  $J$  = 7.6 Hz, 1H), 6.90 (d,  $J$  = 8.4 Hz, 1H), 6.77 (d,  $J$  = 8 Hz, 1H), 6.70 (t,  $J$  = 7.6 Hz, 1H), 6.63 (d,  $J$  = 7.2 Hz, 1H), 5.17 (s, 2H), 3.70 (s, 3H), 3.52 (s, 3H). ESI- MS:  $m/z$  345 [ $\text{M} + \text{H}$ ] $^+$ . Anal. Calcd for  $\text{C}_{22}\text{H}_{20}\text{N}_2\text{O}_2$ : C, 76.72; H, 5.85; N, 8.13. Found: C, 76.83; H, 5.81; N, 7.93.

**Fig. S.I.** I.R Spectra of  $\text{Fe}_3\text{O}_4$  NPs.

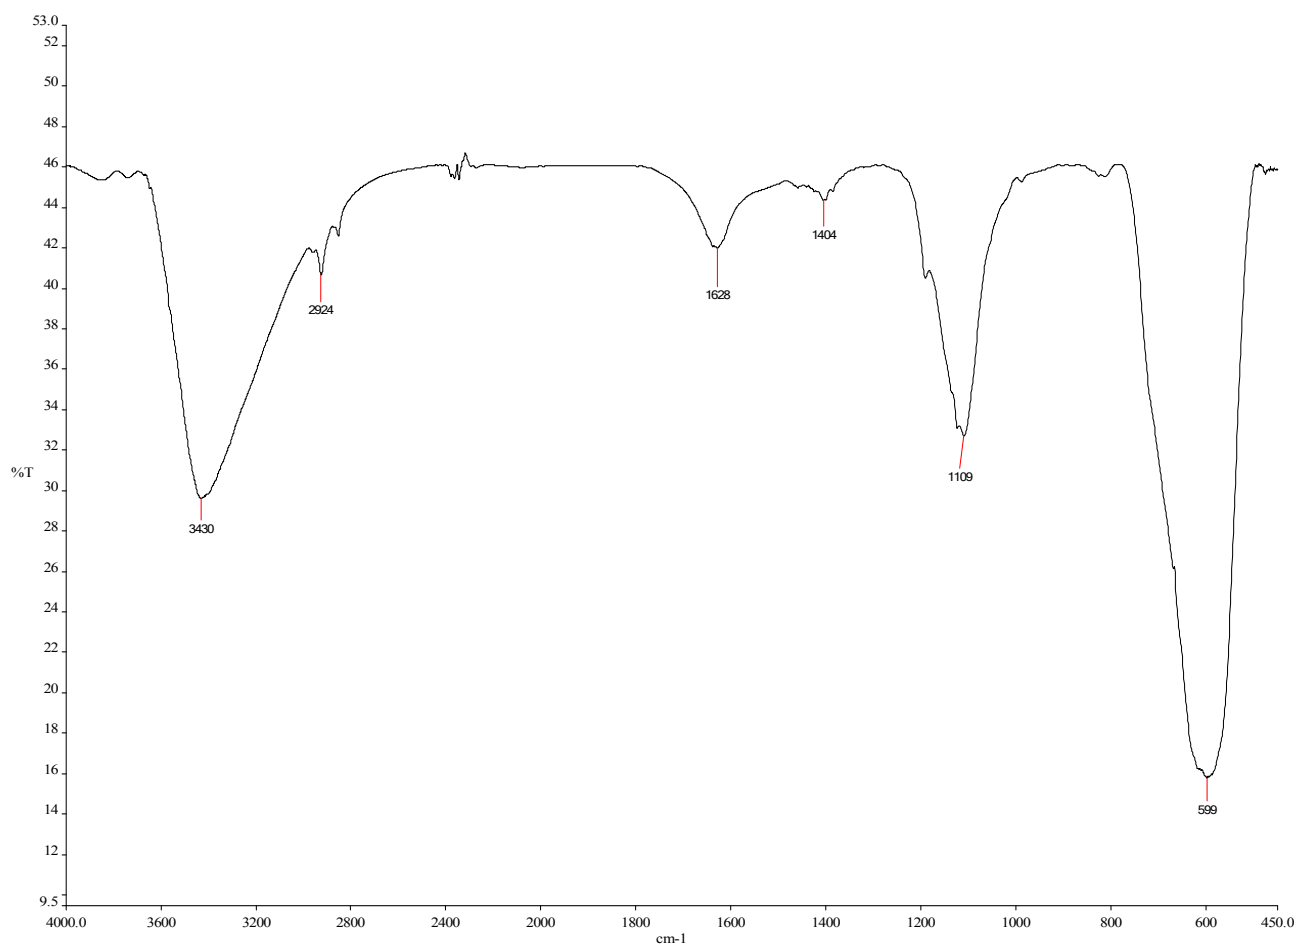

## $^1\text{H}$ & $^{13}\text{C}$ NMR Spectra of compounds 3a-h and 5a-f

### 1. Compound 3a

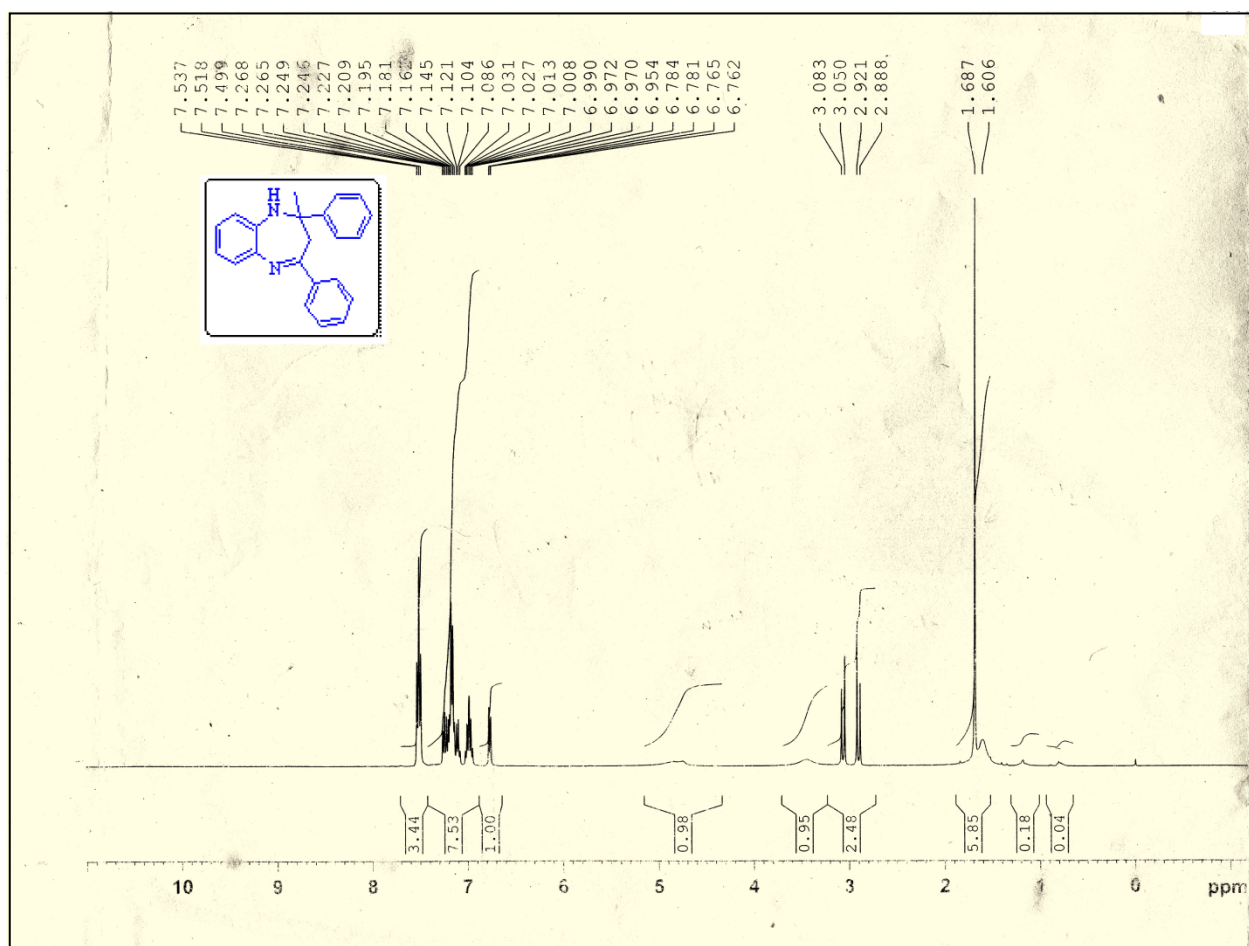

$^1\text{H}$  NMR Spectra of Compound 3a

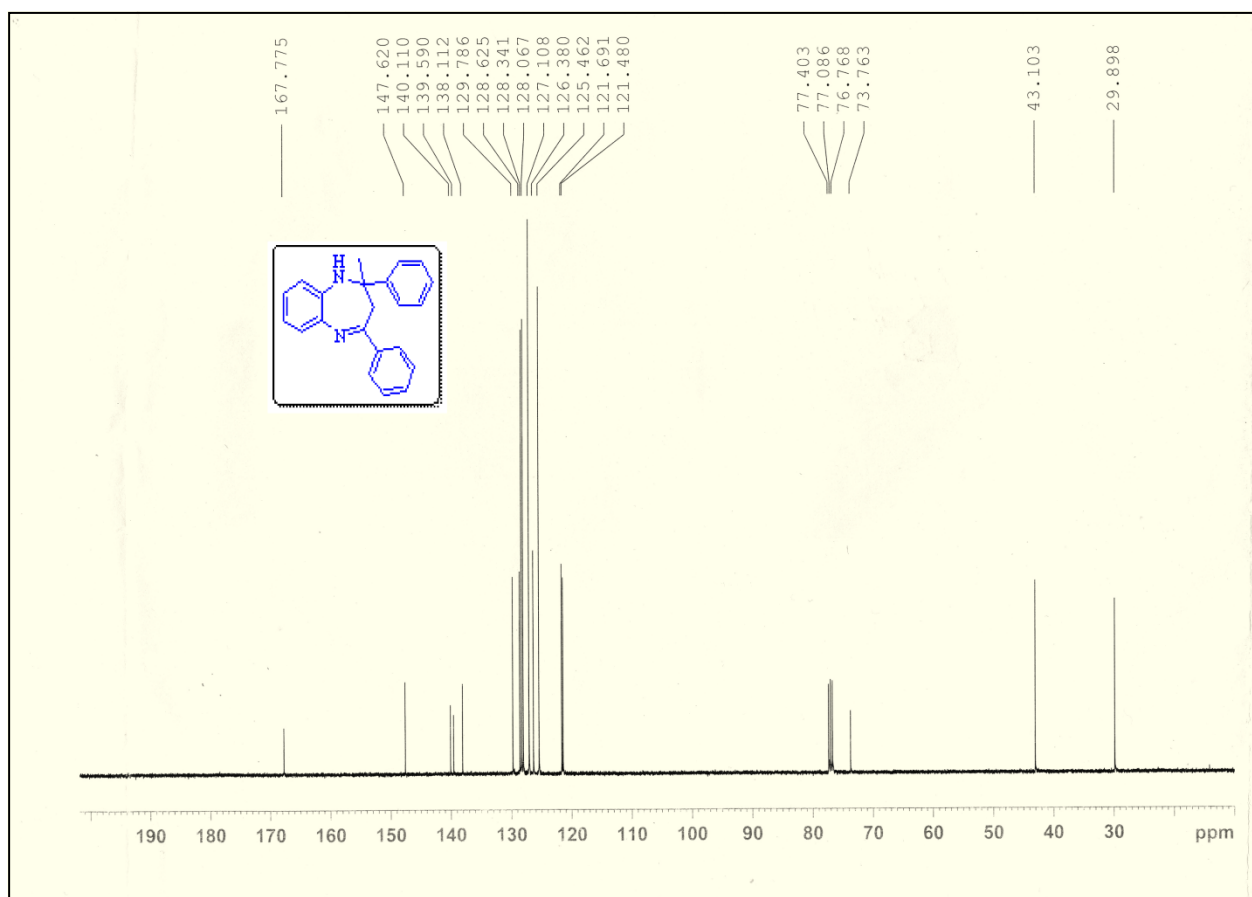

**<sup>13</sup>C NMR Spectra of Compound 3a**

## 2. Compound 3b

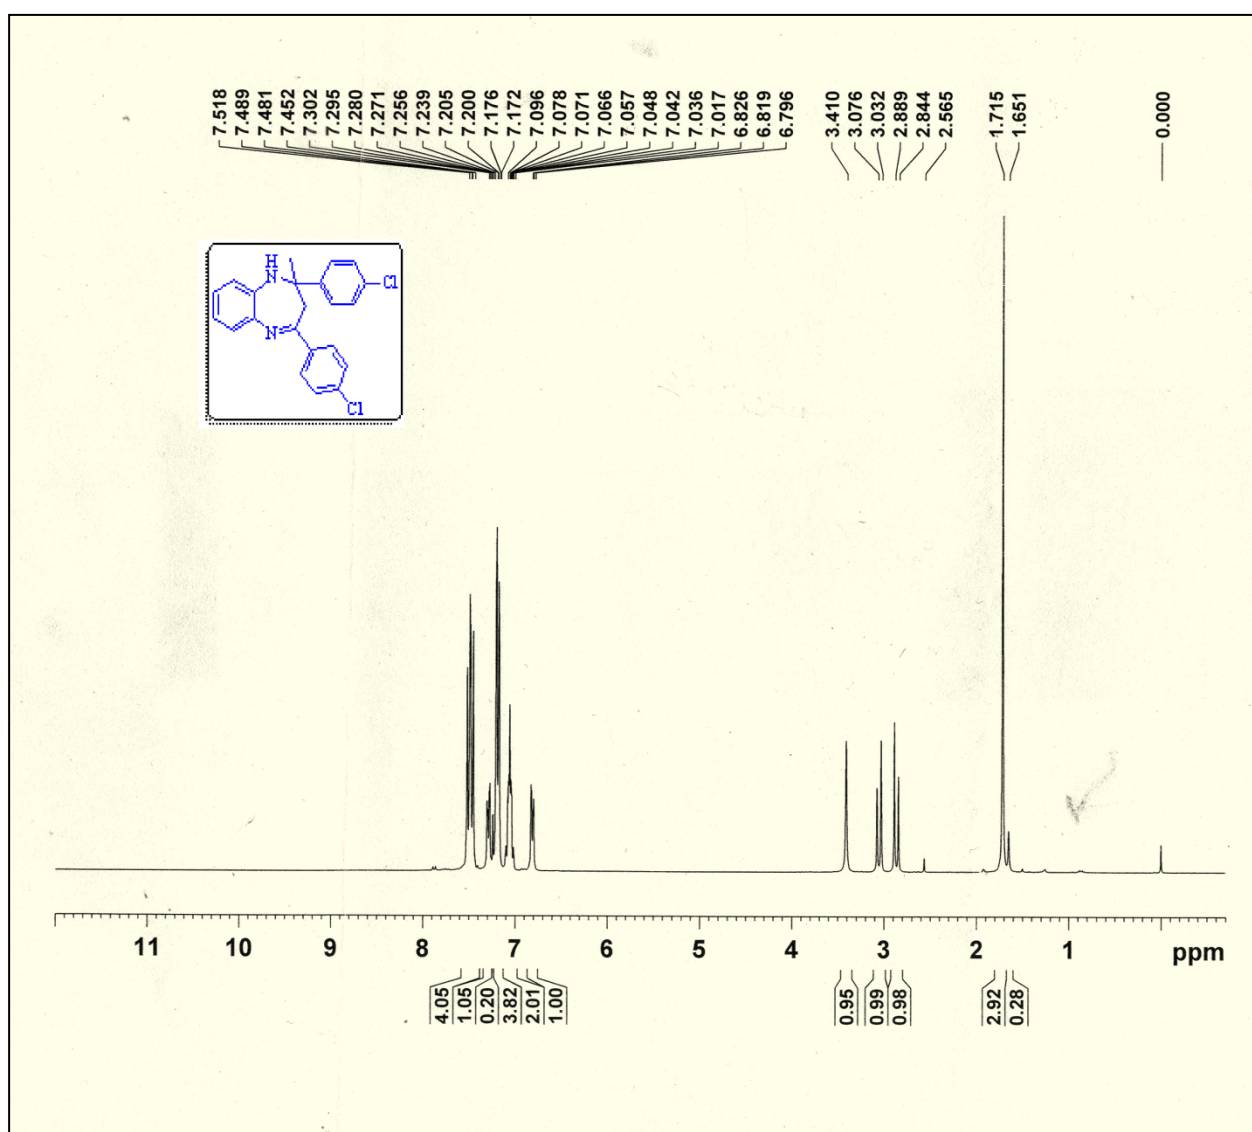

<sup>1</sup>H NMR Spectra of Compound 3b

### 3. Compound 3c

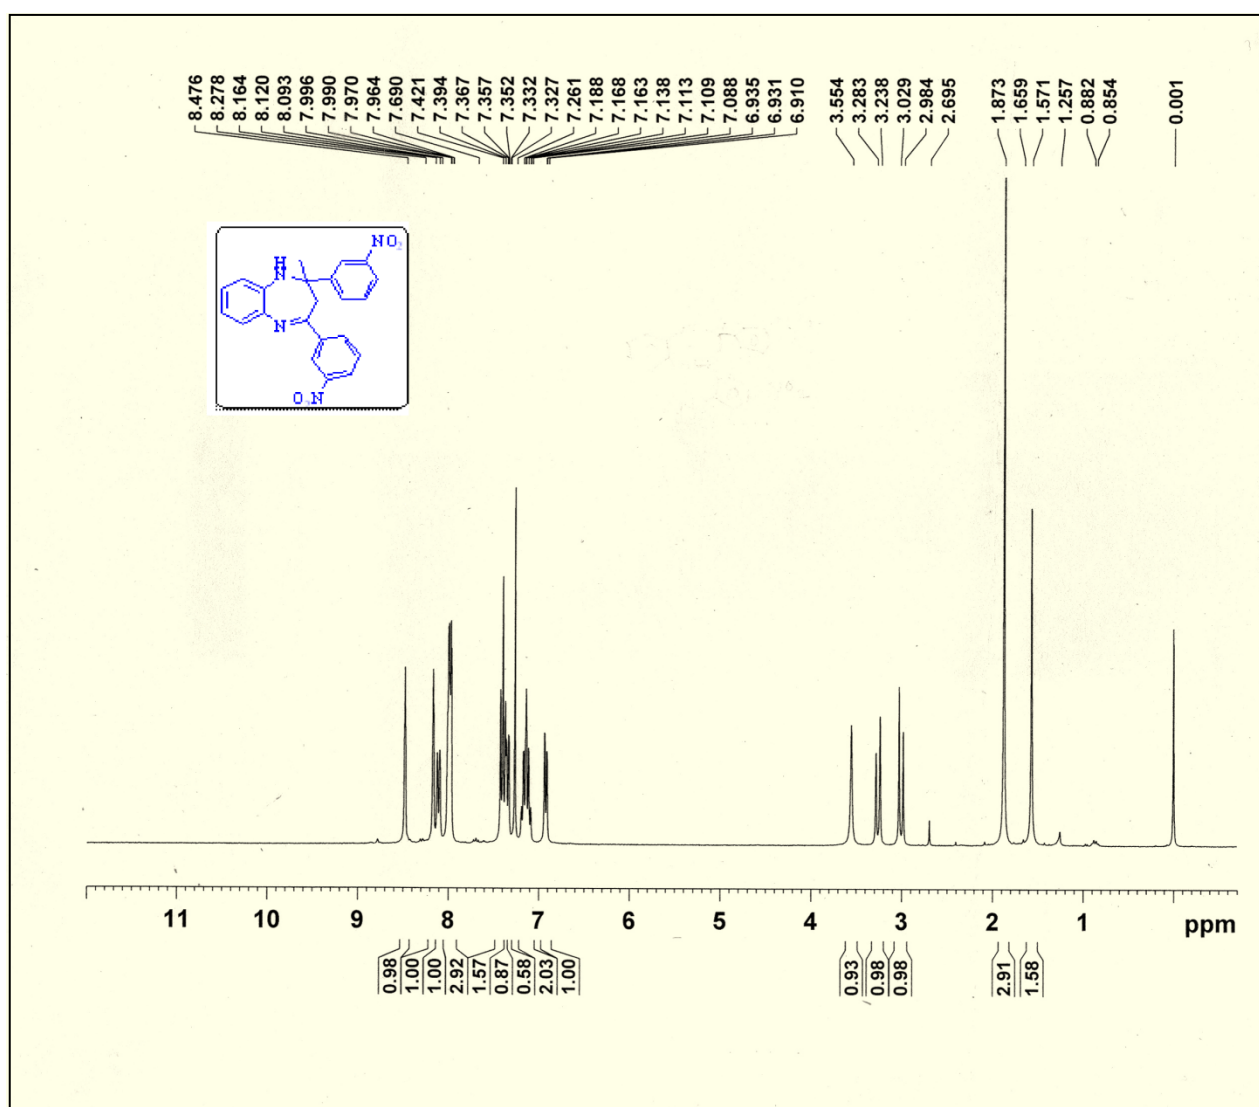

**<sup>1</sup>H NMR Spectra of Compound 3c**

#### 4. Compound 3d

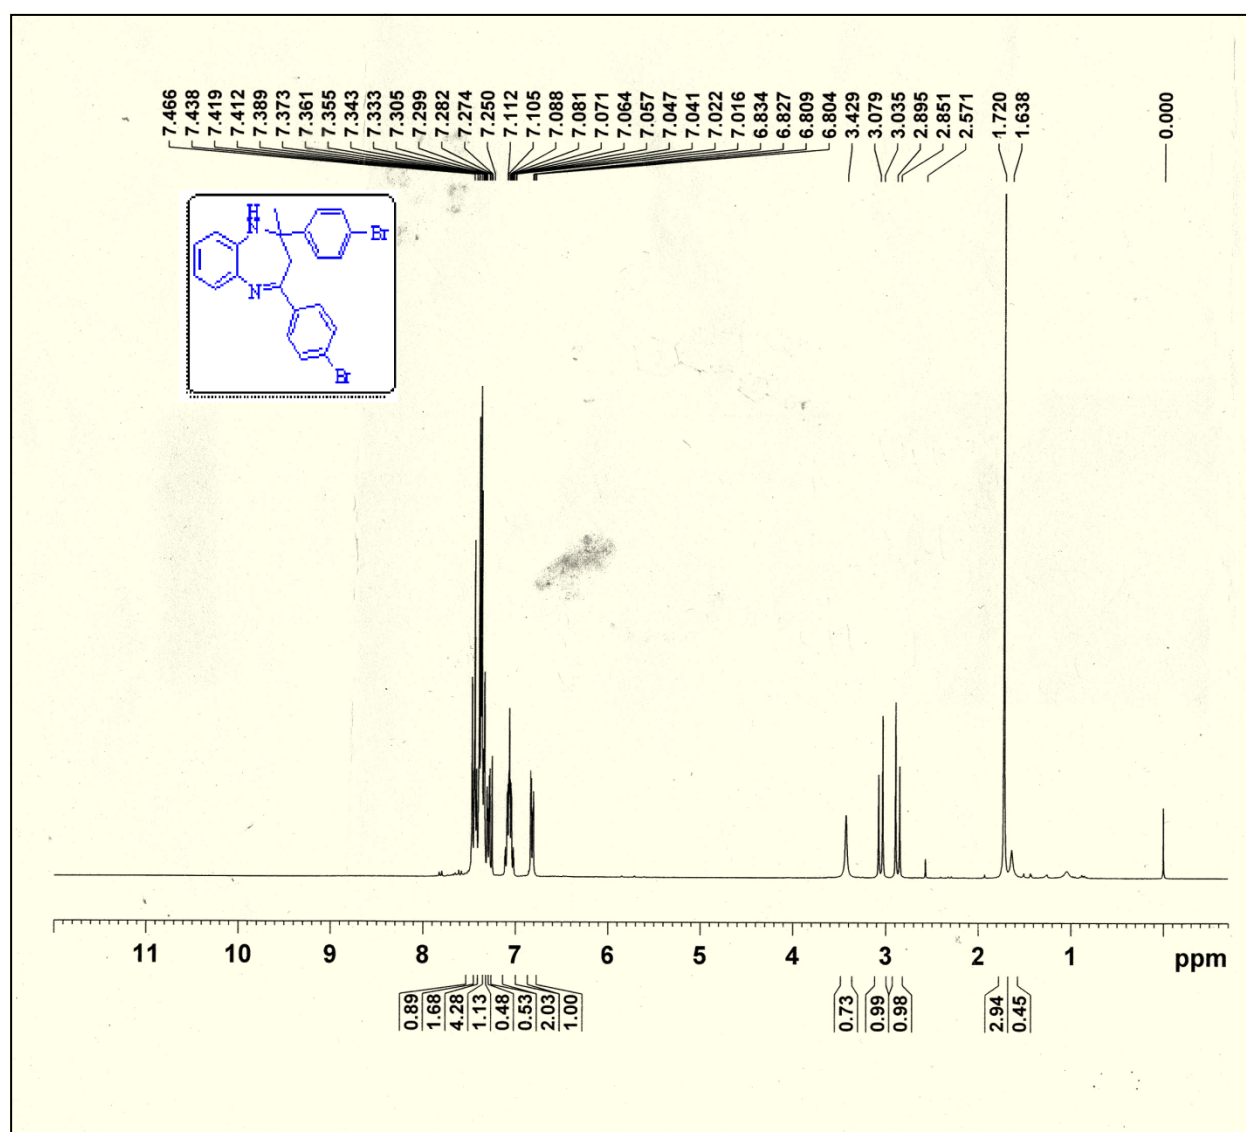

<sup>1</sup>H NMR Spectra of Compound 3d



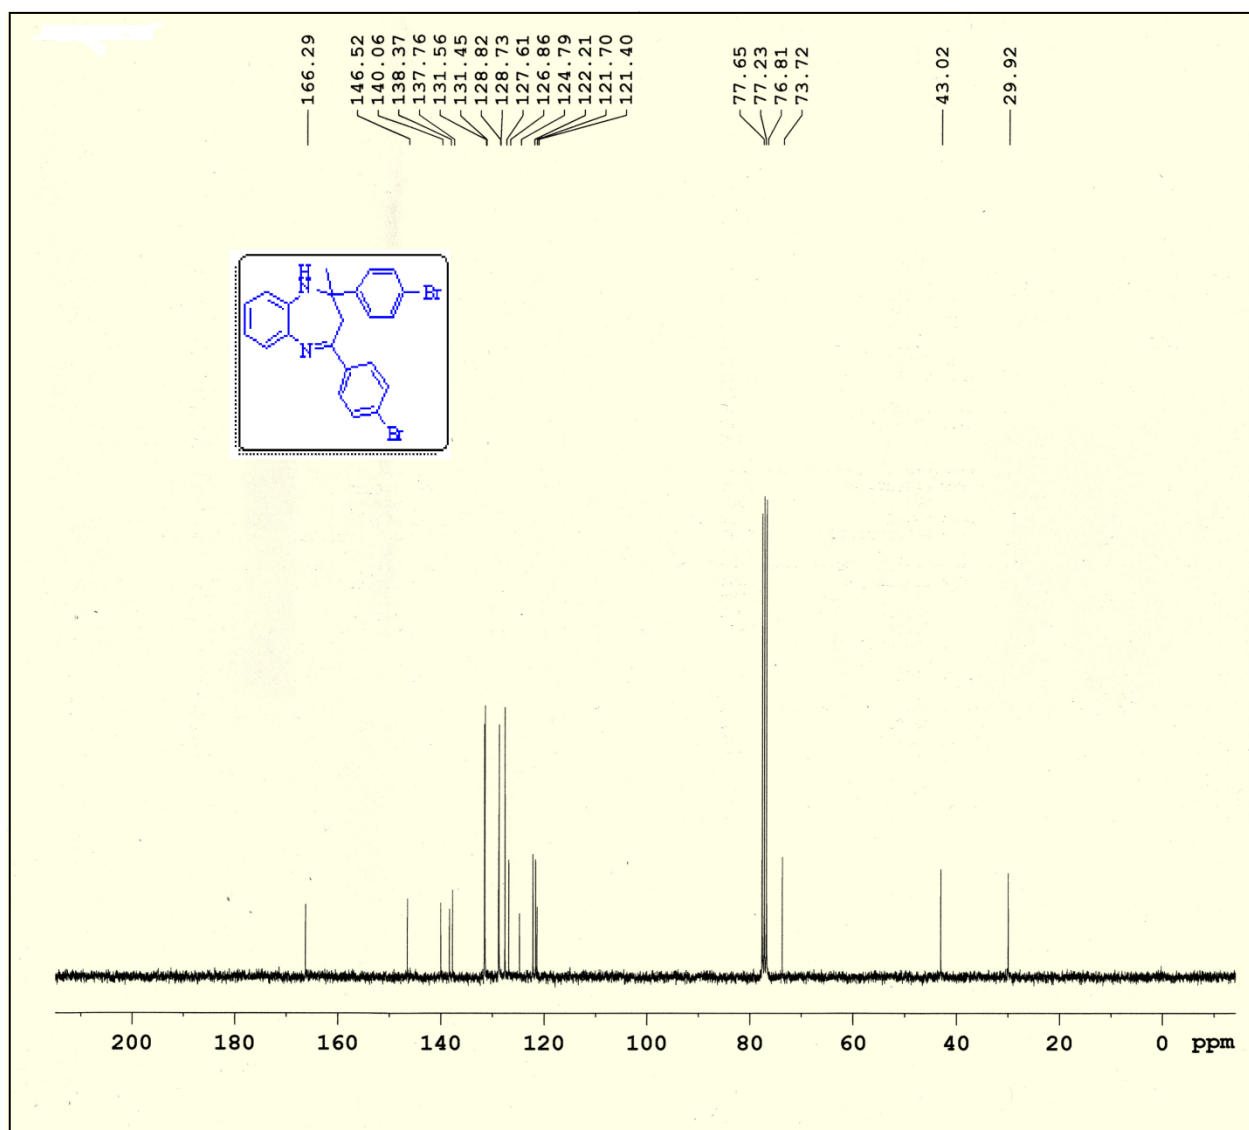

## <sup>13</sup>C NMR Spectra of Compound 3d

### 5. Compound 3e

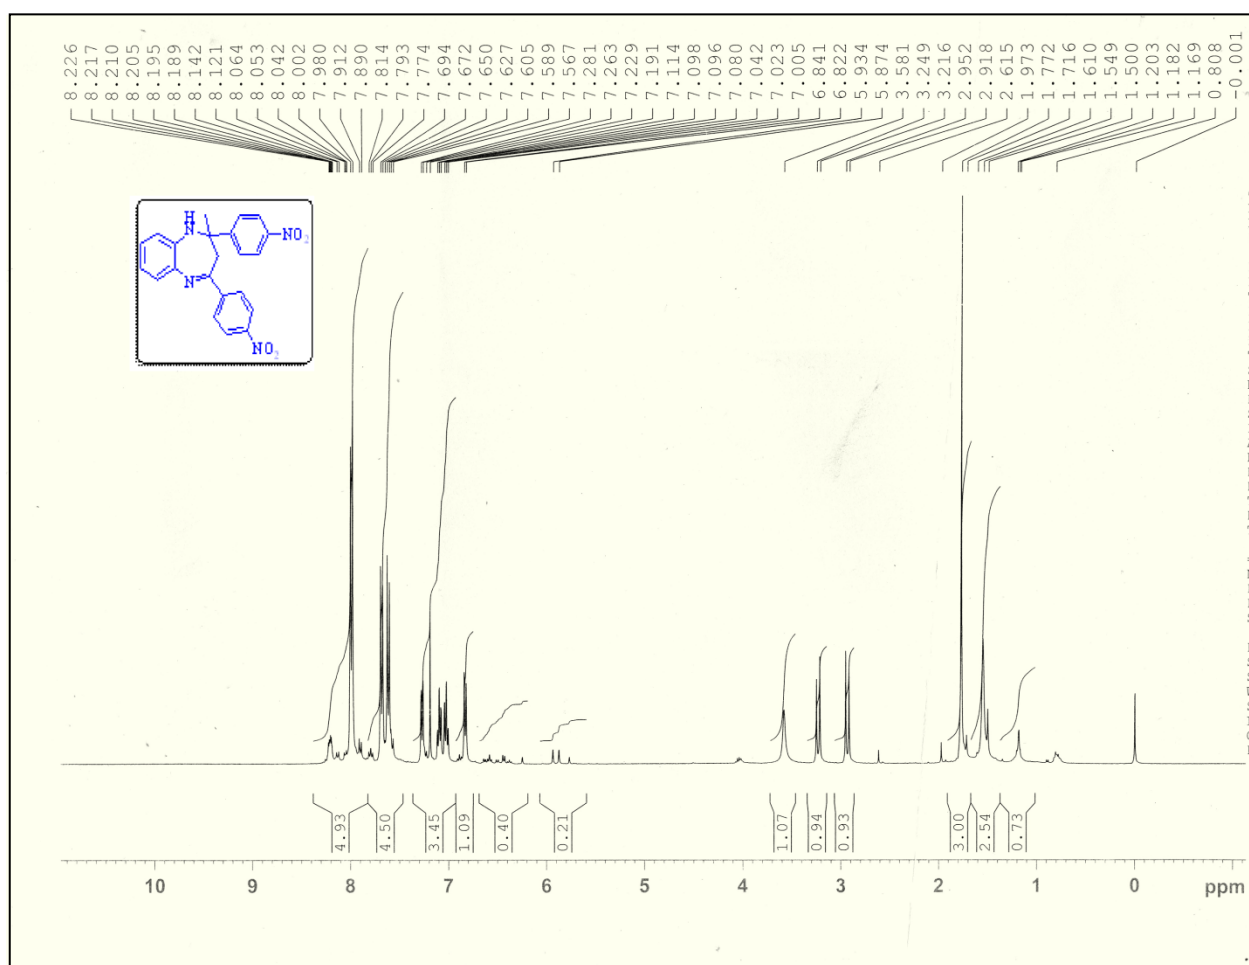

## <sup>1</sup>H NMR Spectra of Compound 3e

## 6. Compound 3f

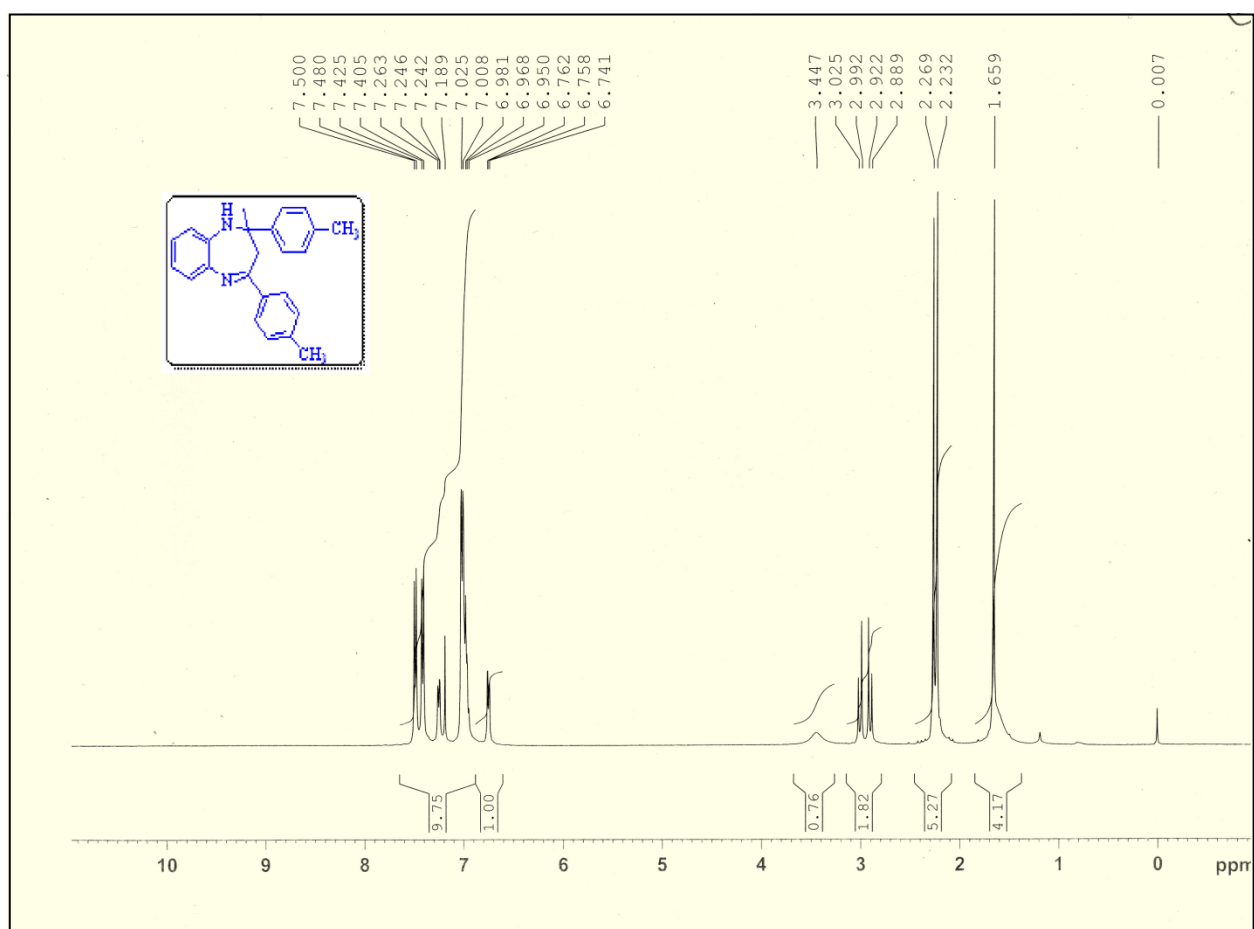

$^1\text{H}$  NMR Spectra of Compound 3f

## 7. Compound 3g

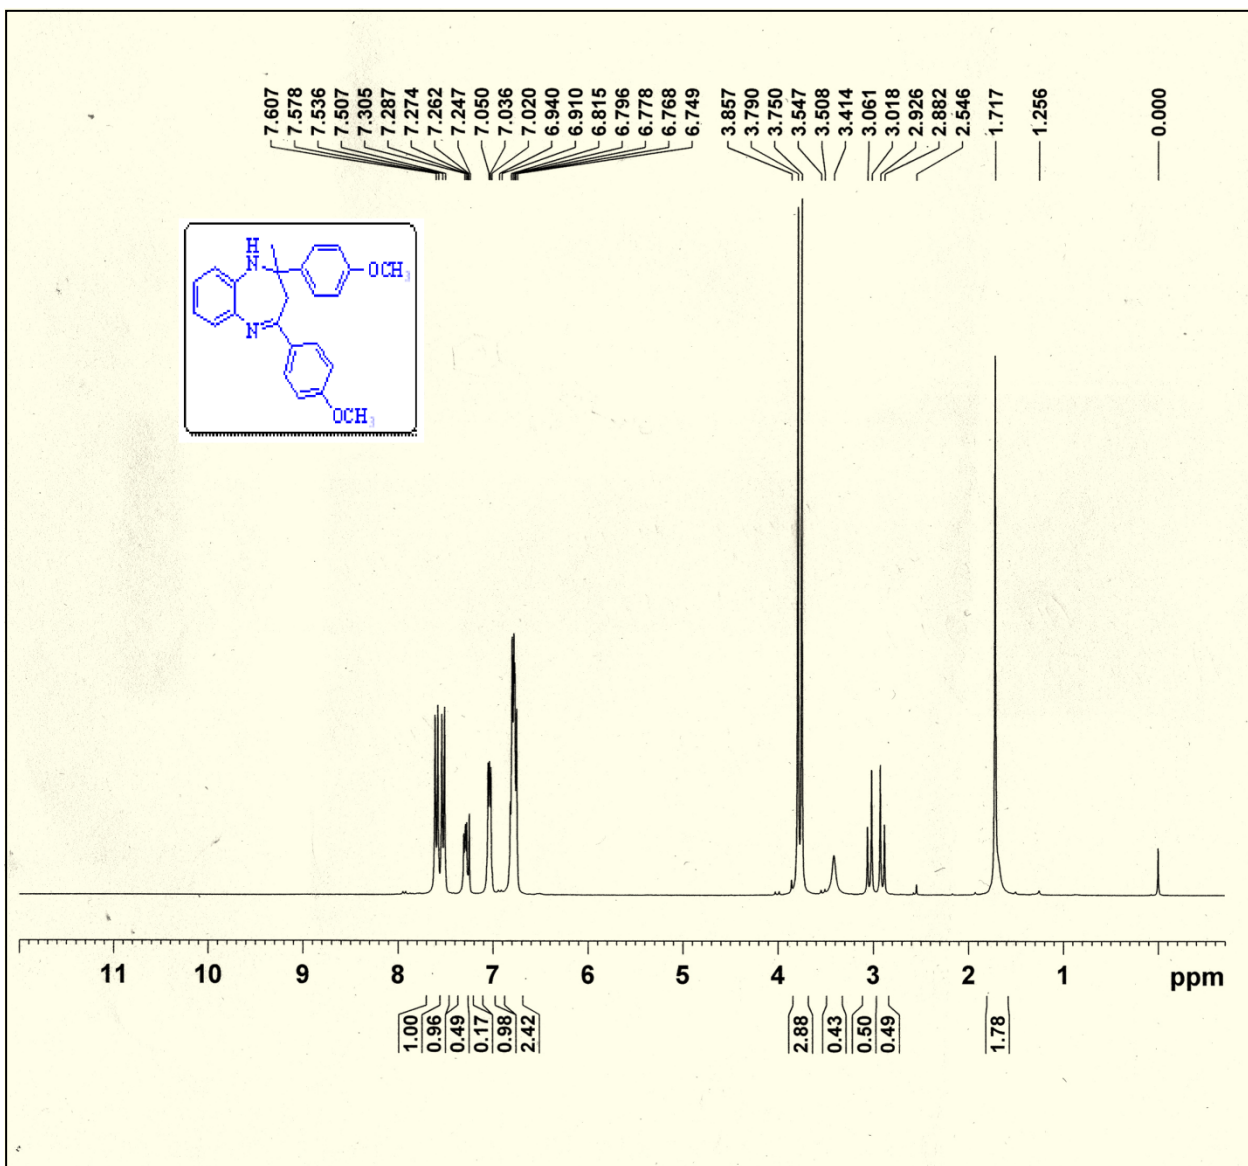

# <sup>1</sup>H NMR Spectra of Compound 3g

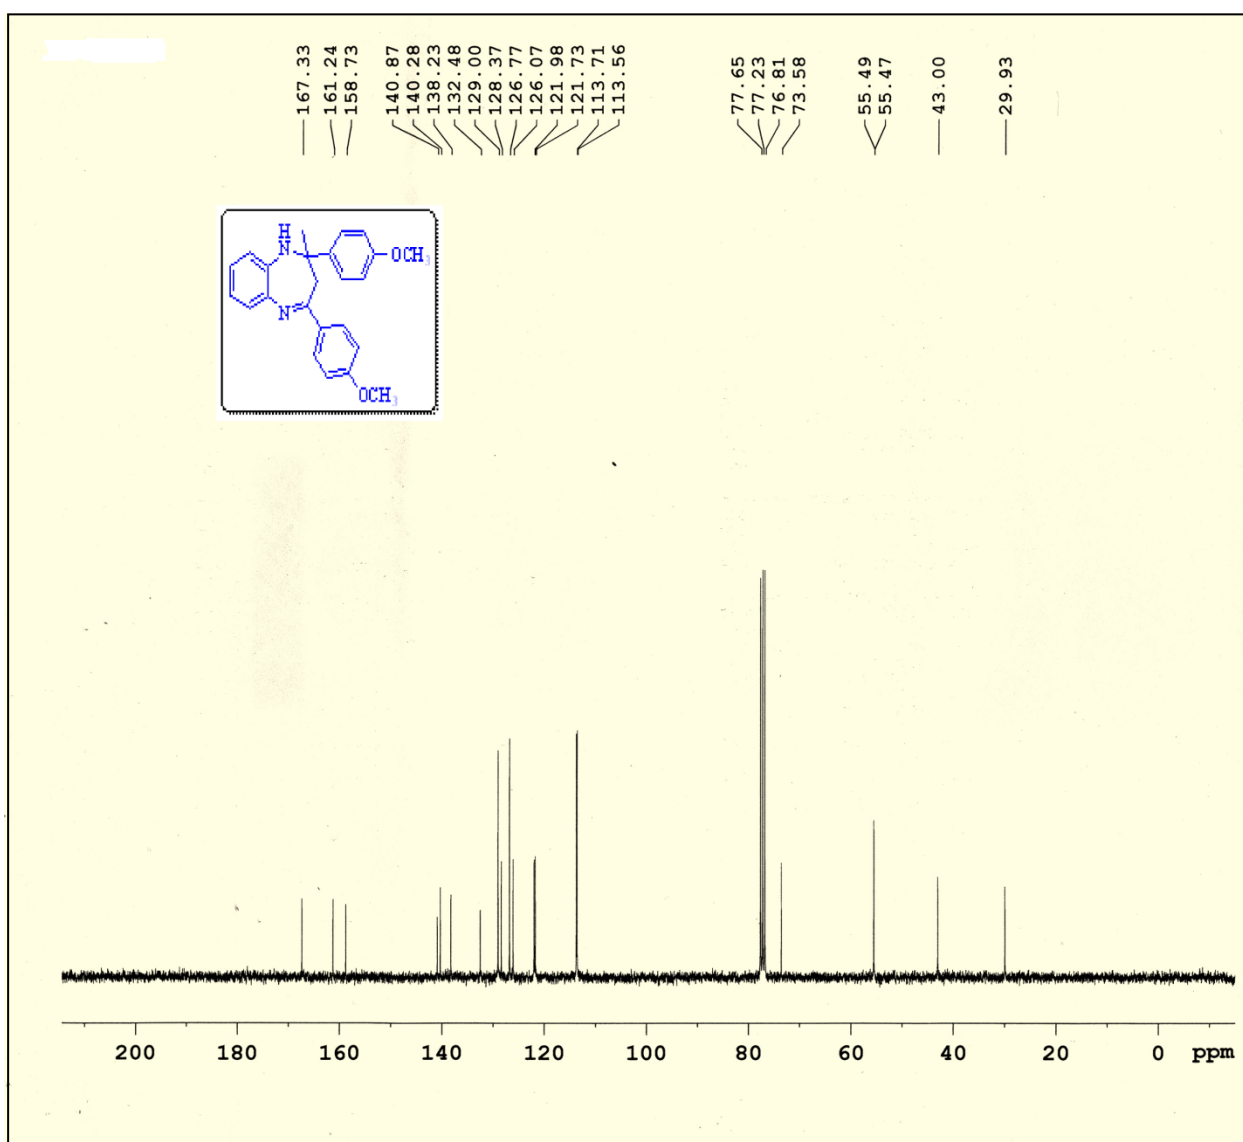

## <sup>13</sup>C NMR Spectra of Compound 3g

### 8. Compound 3h

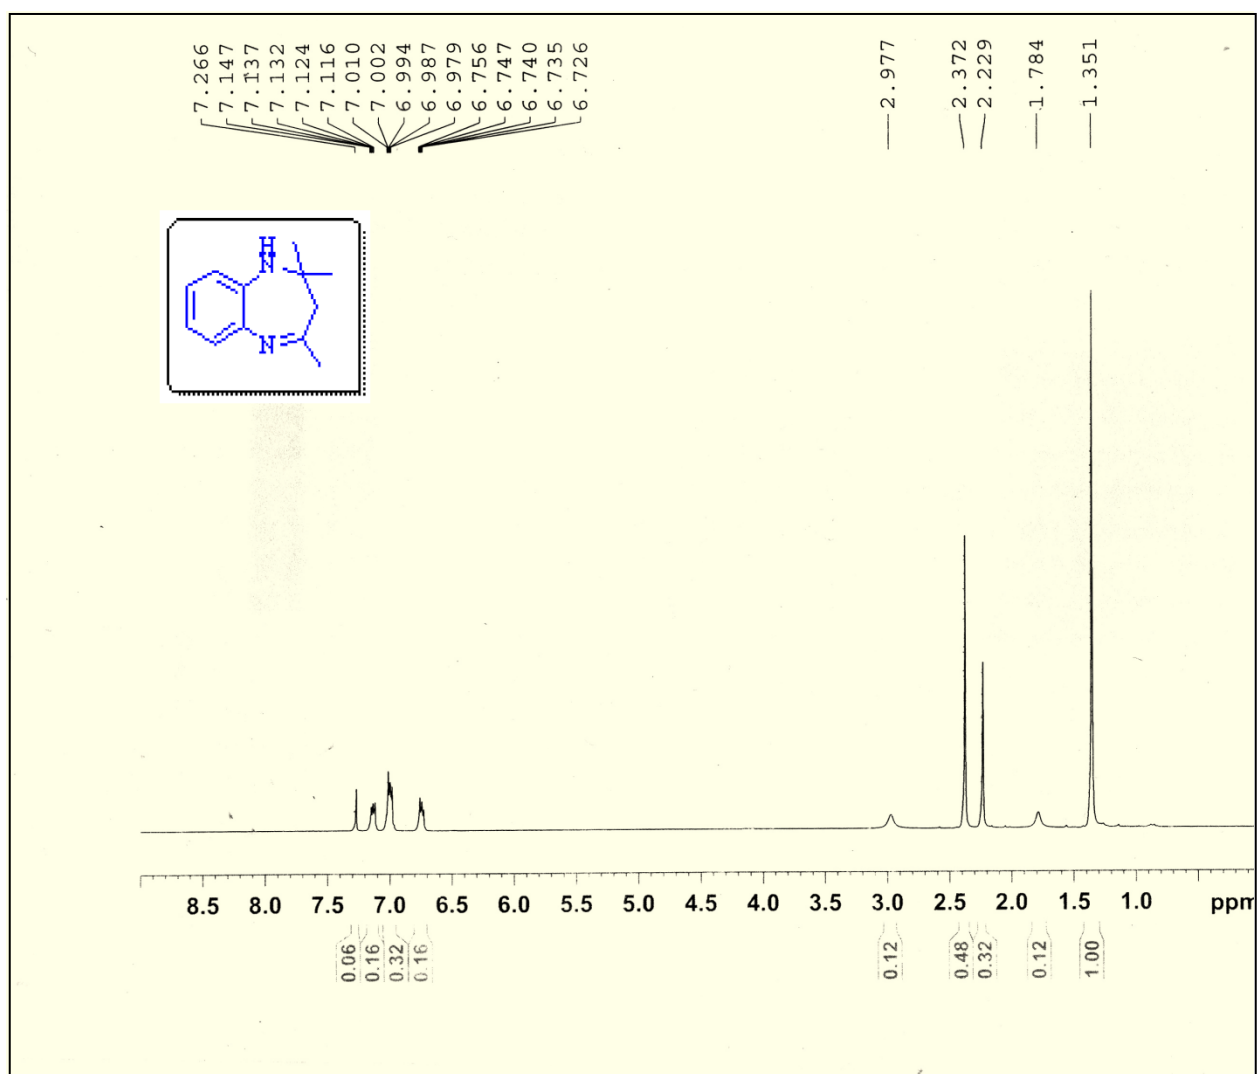

## <sup>1</sup>H NMR Spectra of Compound 3h

## 9. Compound 5a

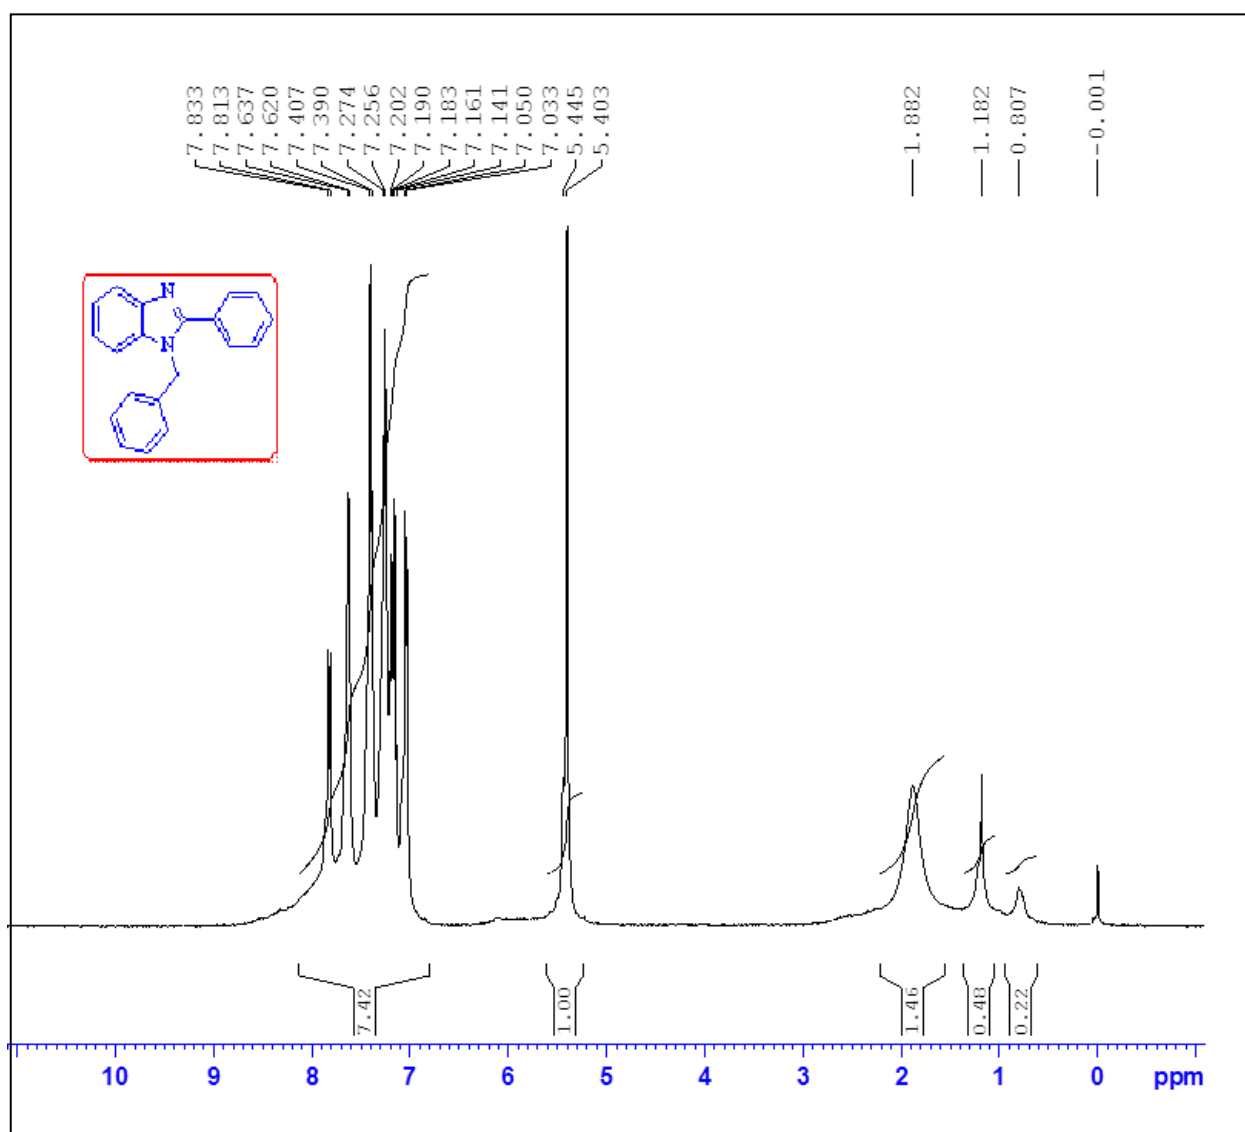

<sup>1</sup>H NMR Spectra of Compound 5a

## 10. Compound 5b

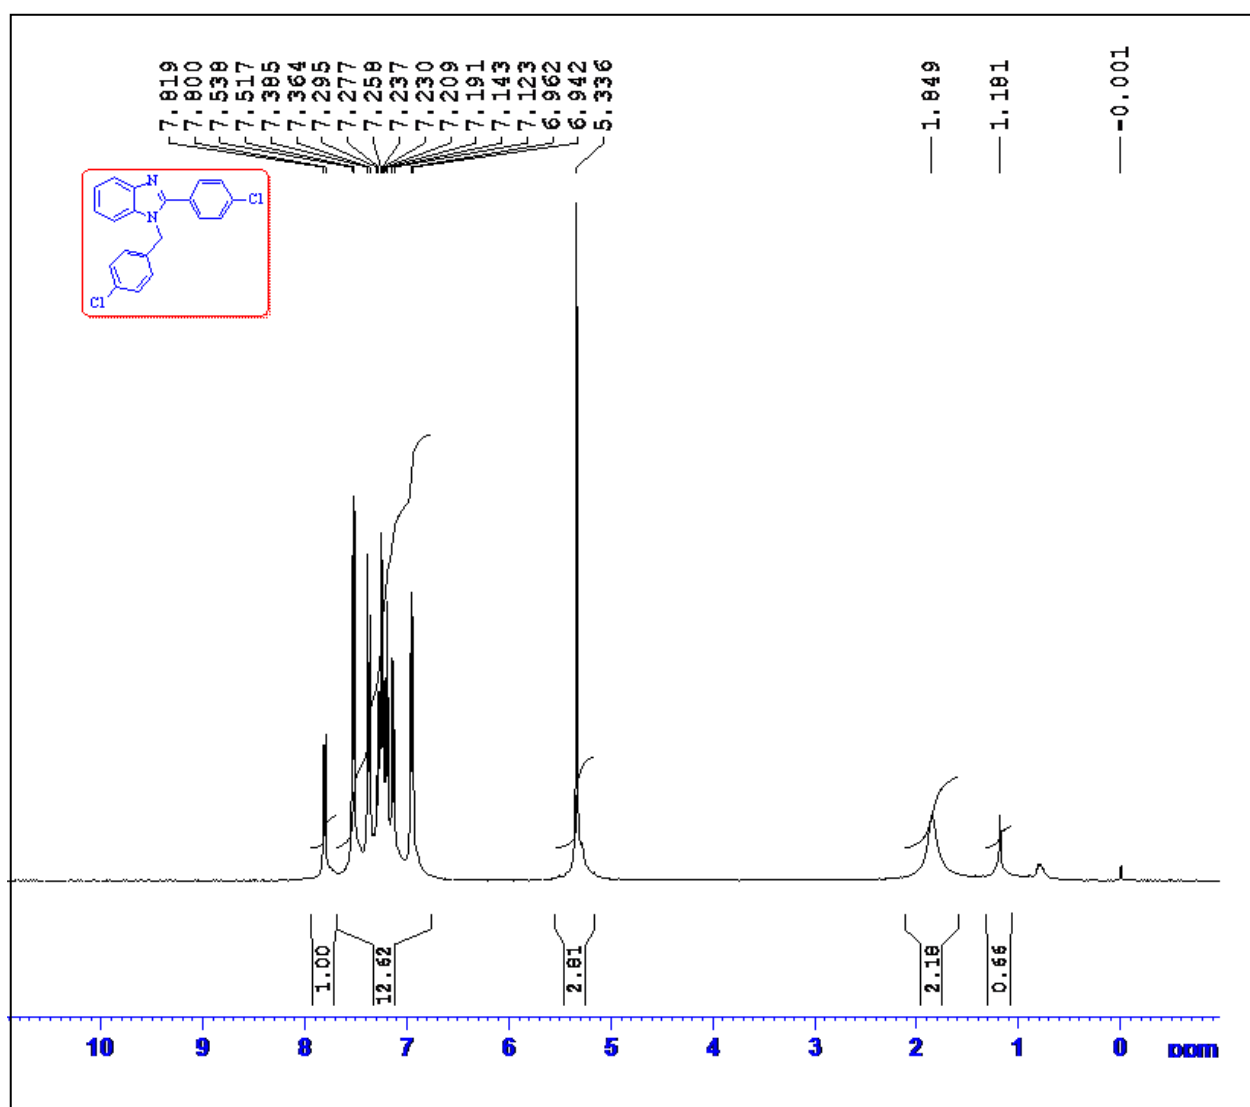

<sup>1</sup>H NMR Spectra of Compound 5b



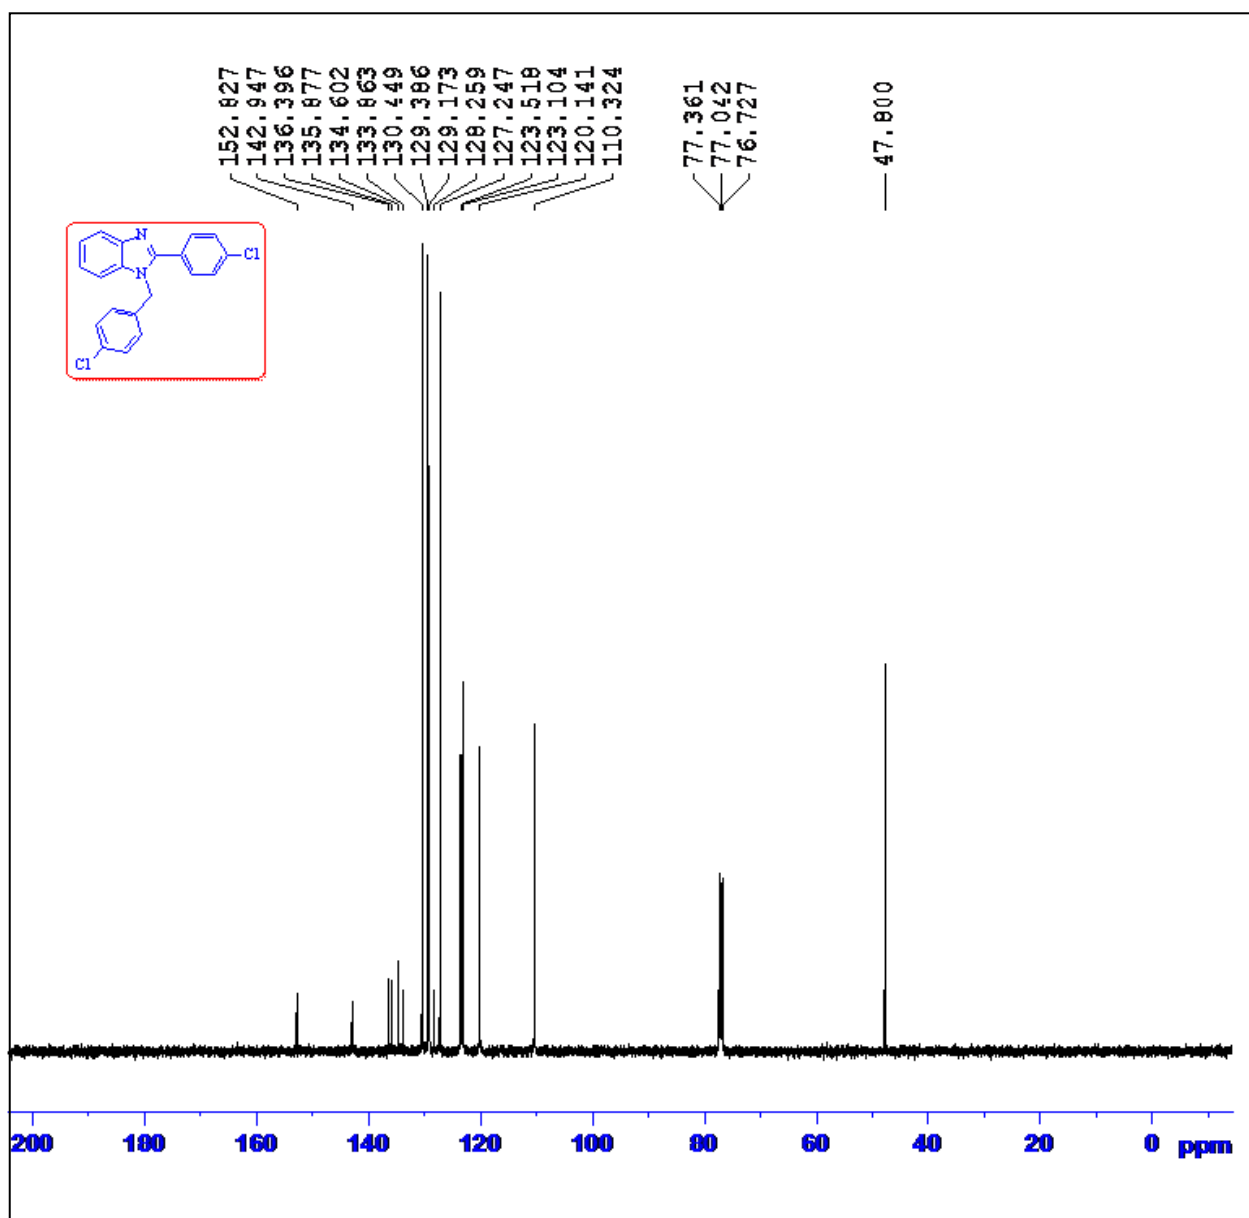

## <sup>13</sup>C NMR Spectra of Compound 5b

### 11. Compound 5c

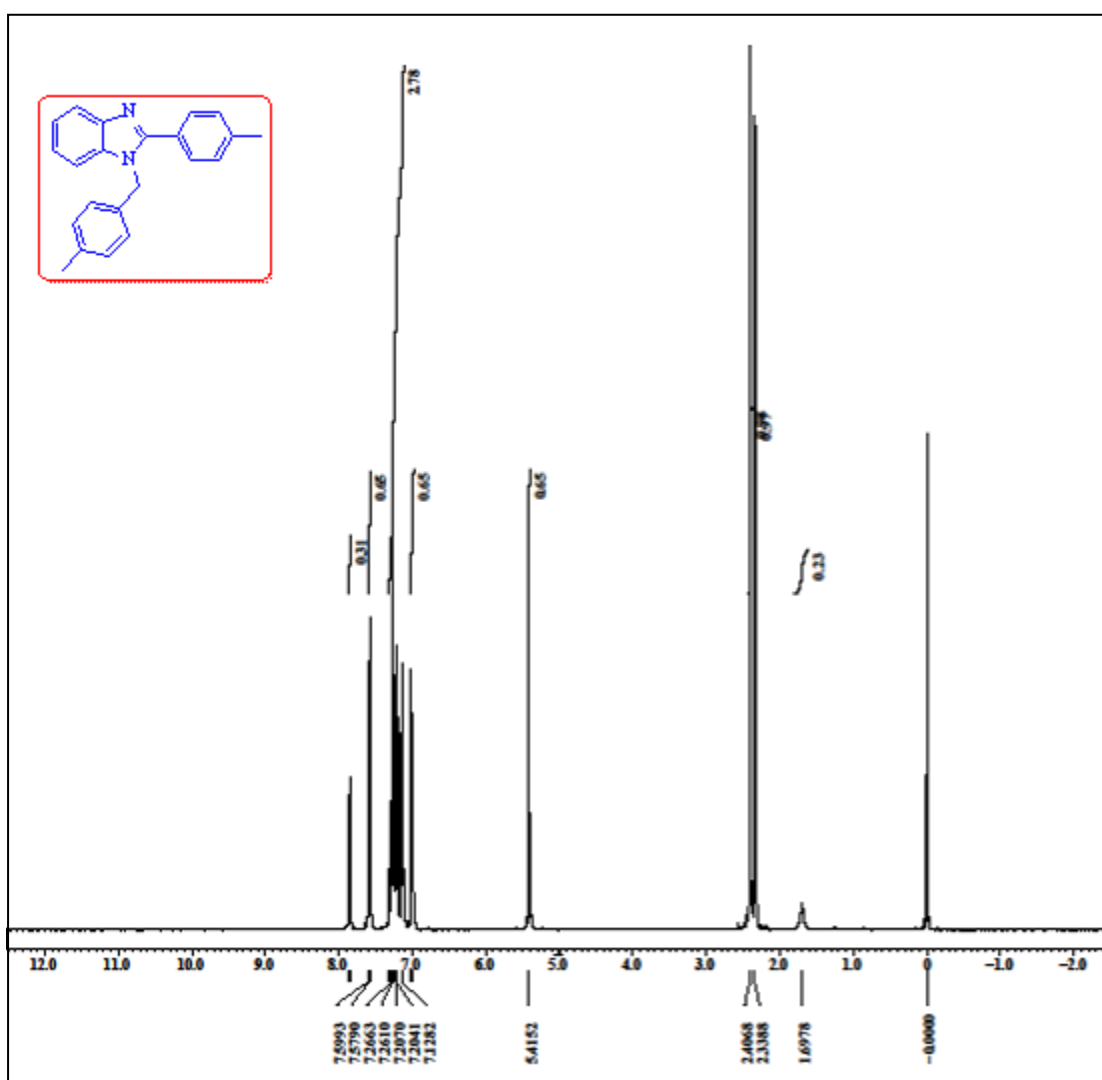

<sup>1</sup>H NMR Spectra of Compound 5c

## 12. Compound 5d

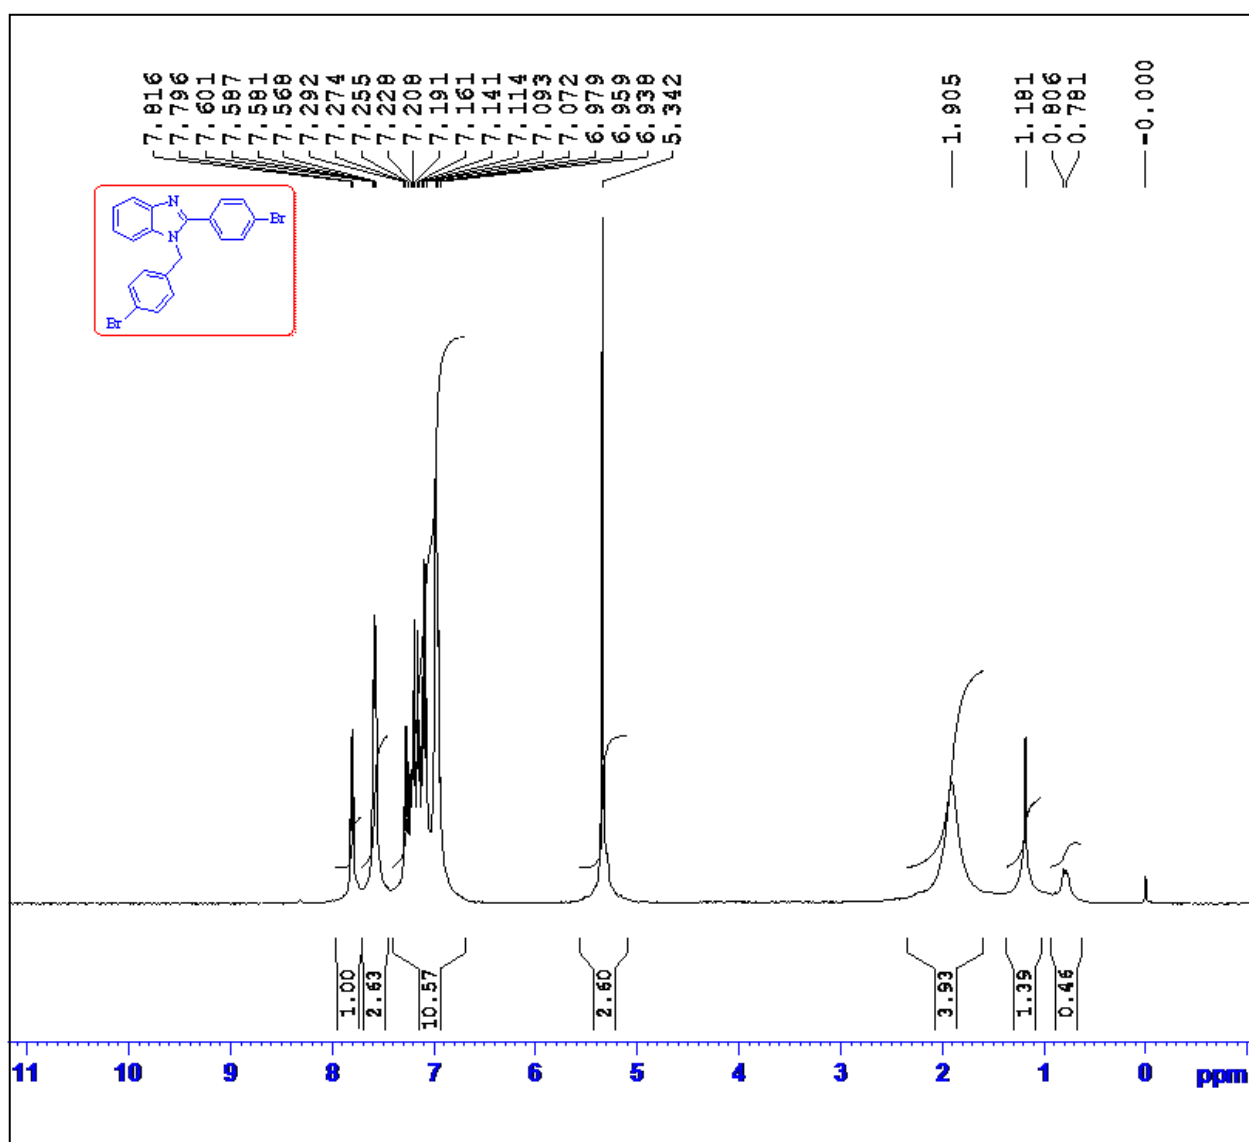

<sup>1</sup>H NMR Spectra of Compound 5d

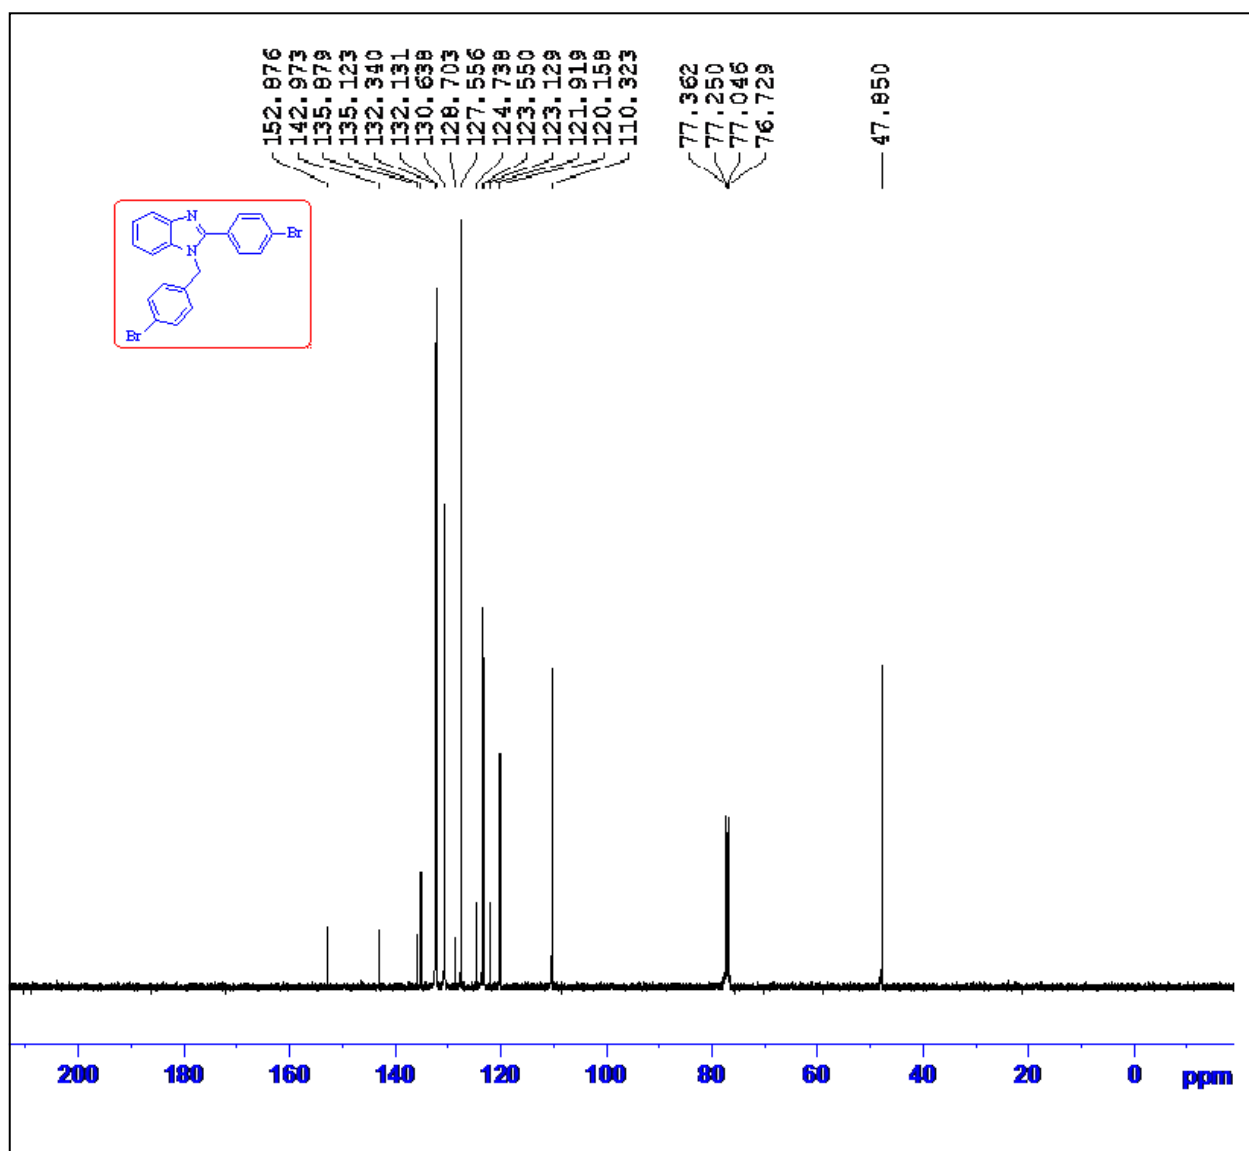

<sup>13</sup>C NMR Spectra of Compound 5d

### 13. Compound 5e

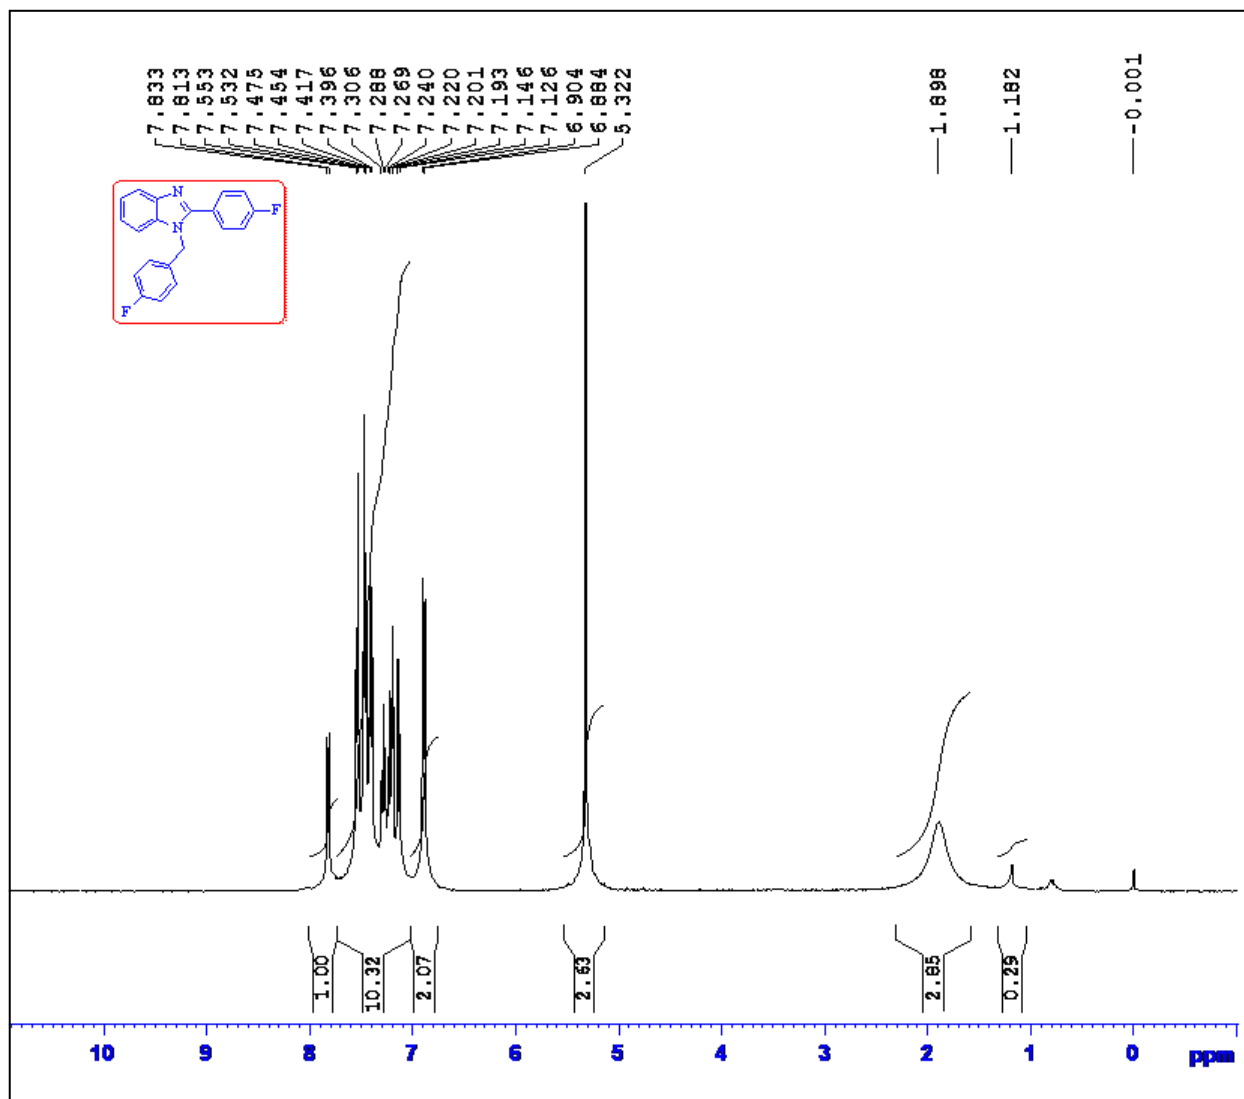

**<sup>1</sup>H NMR Spectra of Compound 5e**

## 14. Compound 5f

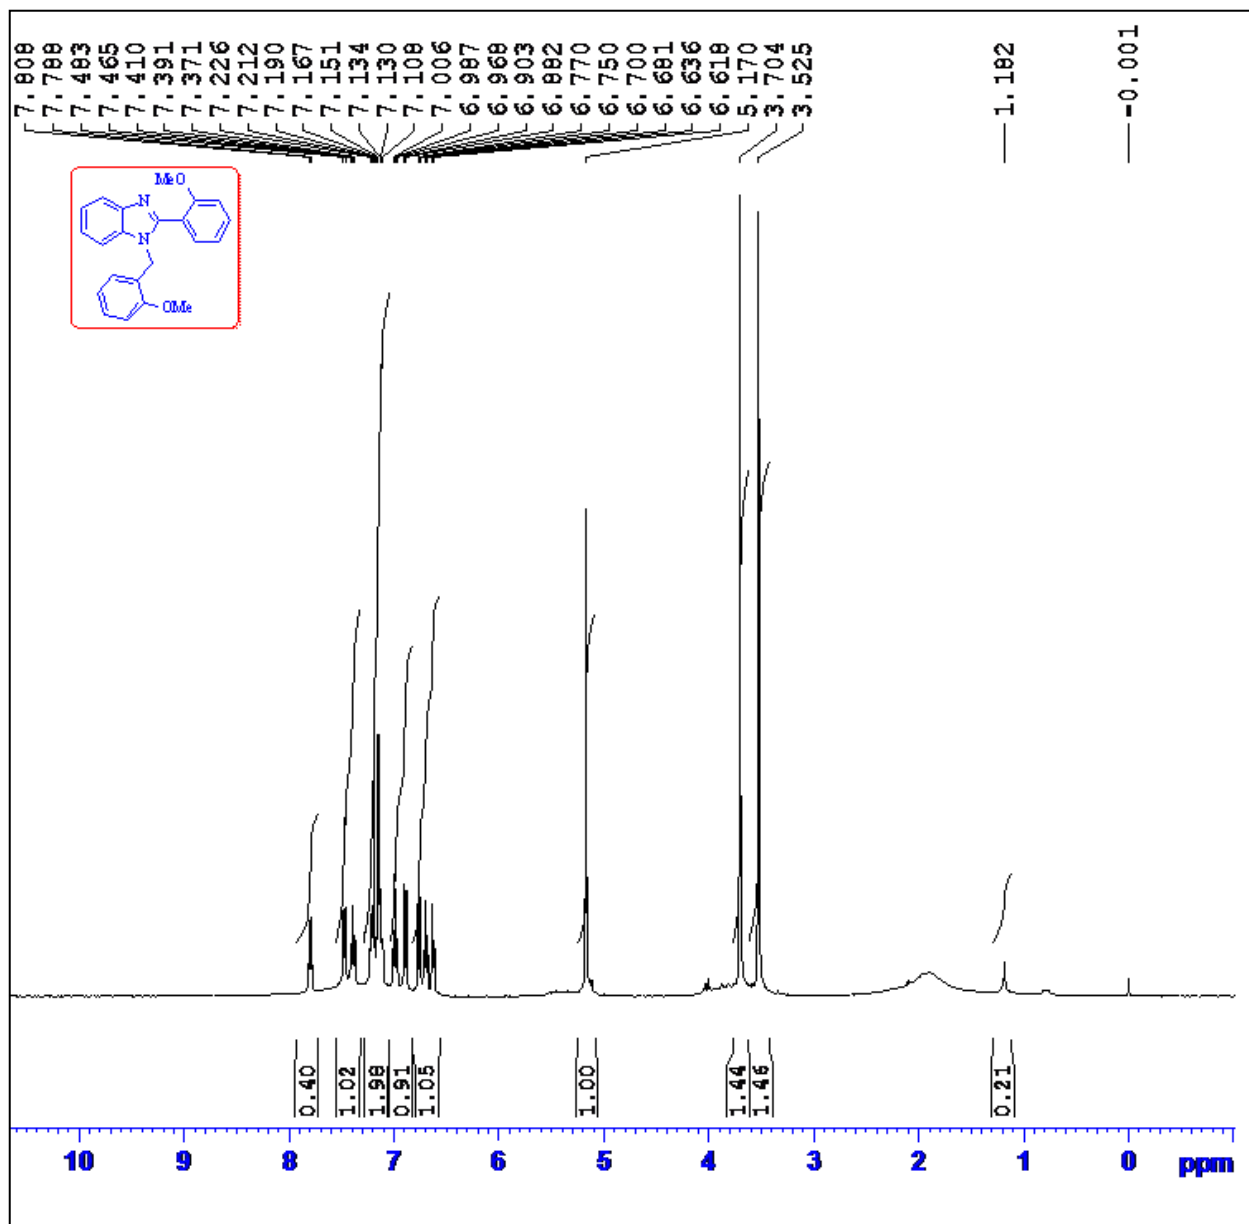

<sup>1</sup>H NMR Spectra of Compound 5f
